# Supplementary material
Source: PubMed Central journal article supplement (PMC7065473)
Supplement: baADV2019000462C-suppl1.pdf [file baADV2019000462C-suppl1.pdf]

SUPPLEMENTAL MATERIAL

|                                                                                                  |                  |
|--------------------------------------------------------------------------------------------------|------------------|
| <b><u>TOPICS FOR THE AMERICAN SOCIETY OF HEMATOLOGY GUIDELINES ON VENOUS THROMBOEMBOLISM</u></b> | <b><u>2</u></b>  |
| <b><u>SEARCH STRATEGIES</u></b>                                                                  | <b><u>3</u></b>  |
| <b>DATABASE: MEDLINE</b>                                                                         | <b>3</b>         |
| <b>1. DATABASE: EMBASE</b>                                                                       | <b>11</b>        |
| <b>2. DATABASE: PSYCINFO</b>                                                                     | <b>19</b>        |
| <b>3. DATABASE: CINAHL</b>                                                                       | <b>22</b>        |
| <b><u>TABLE 1S. SELECTION CRITERIA</u></b>                                                       | <b><u>25</u></b> |
| <b><u>FIGURE 1S. SCREENING ALGORITHM</u></b>                                                     | <b><u>26</u></b> |
| <b><u>TABLE 2S. FT STUDIES EXCLUDED WITH REASONS:</u></b>                                        | <b><u>27</u></b> |
| <b><u>TABLE 3S. – QUANTITATIVE STUDIES’ CHARACTERISTIC AND RESULTS TABLE</u></b>                 | <b><u>41</u></b> |
| <b><u>TABLE 4S. SUMMARY OF ROB FOR UTILITY AND NON-UTILITY QUANTITATIVE STUDIES</u></b>          | <b><u>59</u></b> |
| <b><u>TABLE 5S. – QUALITATIVE STUDIES’ CHARACTERISTIC TABLE</u></b>                              | <b><u>63</u></b> |
| <b><u>TABLE 6S. DESCRIPTIVE SUMMARY OF INCLUDED QUALITATIVE STUDIES (N = 15)</u></b>             | <b><u>66</u></b> |
| <b><u>TABLE 7S. – QUALITATIVE STUDIES’ – STRENGTHS AND WEAKNESSES</u></b>                        | <b><u>67</u></b> |

Topics for the American Society of Hematology guidelines on Venous Thromboembolism

|    |                                                         |
|----|---------------------------------------------------------|
| 1  | Prevention of VTE in Surgical Hospitalized Patients     |
| 2  | Prevention of VTE in Medical Hospitalized Patients      |
| 3  | Treatment of Acute VTE (DVT and PE)                     |
| 4  | Optimal Management of Anticoagulation Therapy           |
| 5  | Prevention and Treatment of VTE in Patients with Cancer |
| 6  | Heparin-Induced Thrombocytopenia (HIT)                  |
| 7  | Thrombophilia                                           |
| 8  | Pediatric VTE                                           |
| 9  | VTE in the Context of Pregnancy                         |
| 10 | Diagnosis of VTE                                        |

Search Strategies

Database: MEDLINE

Interface: Ovid

Search Strategy: search terms

1. \*Attitude to Health/
2. \*Patient Participation/
3. preference\*.ti,ab.
4. \*Patient Preference/
5. choice.ti.
6. choices.ti.
7. value\*.ti.
8. health state values.ti,ab.
9. valuation\*.ti.
10. expectation\*.ti,ab.
11. attitude\*.ti,ab.
12. acceptab\*.ti,ab.
13. knowledge.ti,ab.
14. point of view.ti,ab.
15. user participation.ti,ab.
16. users participation.ti,ab.
17. users' participation.ti,ab.
18. user's participation.ti,ab.
19. patient participation.ti,ab.
20. patients' participation.ti,ab.
21. patients participation.ti,ab.
22. patient's participation.ti,ab.
23. patient perspective\*.ti,ab.
24. patients perspective\*.ti,ab.
25. patients' perspective\*.ti,ab.
26. patient's perspective\*.ti,ab.
27. patient perce\*.ti,ab.
28. patients perce\*.ti,ab.
29. patients' perce\*.ti,ab.
30. patient's perce\*.ti,ab.
31. health perception\*.ti,ab.
32. user view\*.ti,ab.
33. users view\*.ti,ab.
34. users' view\*.ti,ab.
35. user's view\*.ti,ab.
36. patient view\*.ti,ab.
37. patients view\*.ti,ab.
38. patients' view\*.ti,ab.
39. patient's view\*.ti,ab.
40. or/1-39
41. patient\*.ti.
42. user\*.ti.
43. men.ti.
44. women.ti.
45. or/41-44
46. exp \*Decision Making/
47. decision mak\*.ti,ab.
48. decisions mak\*.ti,ab.
49. decision\*.ti.
50. mak\*.ti.
51. 49 and 50
52. avoidance learning/
53. 46 or 47 or 48 or 51 or 52

54. 45 and 53  
 55. discrete choice.ti,ab.  
 56. decision board\*.ti,ab.  
 57. decision analy\*.ti,ab.  
 58. decision-support.ti,ab.  
 59. decision tool\*.ti,ab.  
 60. decision aid\*.ti,ab.  
 61. discrete-choice\*.ti,ab.  
 62. decision\*.ti,ab.  
 63. 55 or 56 or 57 or 58 or 59 or 60 or 61 or 62  
 64. 45 and 63  
 65. 54 or 64  
 66. decision support techniques/  
 67. (health and utilit\*).ti.  
 68. gamble\*.ti,ab.  
 69. prospect theory.ti,ab.  
 70. preference score.ti,ab.  
 71. preference elicitation.ti,ab.  
 72. health utilit\*.ti,ab.  
 73. (utility and (value\* or score\* or estimate\*)).mp. [mp=title, abstract, original title, name of substance word, subject heading word, keyword heading word, protocol supplementary concept word, rare disease supplementary concept word, unique identifier]  
 74. health state.ti,ab.  
 75. feeling thermometer\*.ti,ab.  
 76. best-worst scaling.ti,ab.  
 77. best worst scaling.mp.  
 78. best worst.ti,ab.  
 79. TTO.ti,ab.  
 80. time trade-off.ti,ab.  
 81. probability trade-off.ti,ab.  
 82. or/66-81  
 83. Choice Behavior/  
 84. or/66-83  
 85. preference based.ti,ab.  
 86. preference score.ti,ab.  
 87. multiattribute.ti,ab.  
 88. multi attribute.mp.  
 89. EuroQoL 5D.mp.  
 90. EuroQoL5D.ti,ab.  
 91. EQ5D.mp.  
 92. EQ 5D.ti,ab.  
 93. SF6D.ti,ab.  
 94. SF 6D.ti,ab.  
 95. HUI.ti,ab.  
 96. 15D.ti,ab.  
 97. or/85-96  
 98. SF36.ti,ab.  
 99. SF 36.ti,ab.  
 100. SF12.ti,ab.  
 101. SF 12.mp.  
 102. HRQoL.ti,ab.  
 103. QoL.ti,ab.  
 104. quality of life.ti,ab.  
 105. "Quality of Life"/  
 106. or/98-105  
 107. 40 or 65 or 84 or 97 or 106  
 108. exp Thromboembolism/ or exp Venous Thromboembolism/

109. exp Pulmonary Embolism/  
 110. exp Venous Thrombosis/  
 111. Thrombophlebitis/  
 112. (DVT or VTE or PE).mp.  
 113. ((Pulmon\$ or vein or venous or lung) adj (Emboli\$ or thromb\$)).mp.  
 114. (thrombus\* or thrombotic\* or thrombolic\* or thromboemboli\* or thrombos\* or embol\*).mp.  
 115. (((deep or thromb\* or stasis) adj2 (vein\* or venous)) or (blood flow stasis or blood clot)).mp.  
 116. or/108-115  
 117. exp Thrombocytopenia/  
 118. thrombocytopen\*.mp.  
 119. or/117-118  
 120. (heparin\* or acute or secondary or isolated).mp.  
 121. 119 and 120  
 122. ((Heparin adj2 thrombocytopenia) or Heparin-induced thrombocytopenia or (acute adj3 thrombocytopenia) or isolated thrombocytopenia).mp.  
 123. ((HIT or HITT) and (prothromb\* or thromb\* or heparin\*)).mp.  
 124. or/121-123  
 125. 116 or 124  
 126. exp Hemorrhage/  
 127. (bleed\$ or hemorrhage or haemorrhage or bloodloss\$ or blood loss\$).ti,ab,kw.  
 128. 126 or 127  
 129. Intracranial Embolism/  
 130. Intracranial Thrombosis/  
 131. exp "Intracranial Embolism and Thrombosis"/  
 132. exp Sinus Thrombosis, Intracranial/  
 133. ((cerebral vein or cerebral venous or sinus or intracranial) adj thrombo\*).ti,ab,kw.  
 134. ((intracranial or cerebral) adj embolism).ti,ab,kw.  
 135. 129 or 130 or 131 or 132 or 133 or 134  
 136. exp Cerebral Hemorrhage/  
 137. Intracranial Hemorrhages/  
 138. ((cerebral or intracerebral or intracranial or brain) adj1 (hemorrhag\* or haemorrhag\* or bleed\*)).ti,ab,kw.  
 139. ((hemorrhag\* or haemorrhag\*) adj1 stroke).ti,ab,kw.  
 140. 136 or 137 or 138 or 139  
 141. exp hospitalization/  
 142. (hospital stay or ("length of stay" adj hospital)).ti,ab,kw.  
 143. hospitali?ation.ti,ab,kw.  
 144. 141 or 142 or 143  
 145. abortion, spontaneous/  
 146. exp Embryo Loss/  
 147. exp Fetal Death/  
 148. Aborted Fetus/  
 149. Pregnancy Outcome/  
 150. Pregnancy Complications/  
 151. (((fetal or fetus or foetus or pregnancy or embryo) adj1 (loss or death)) or miscarr\*).ti,ab,kw.  
 152. 145 or 146 or 147 or 148 or 149 or 150 or 151  
 153. Hypersensitivity/  
 154. Contrast Media/  
 155. 153 and 154  
 156. ((Allerg\* adj reaction\*) and (contrast adj (dye\* or medi\*))).ti,ab,kw.  
 157. 155 or 156  
 158. exp Mesenteric Vascular Occlusion/  
 159. exp Mesenteric Ischemia/  
 160. Mesenteric vein thrombosis.mp.  
 161. Mesenteric venous thrombosis.mp.  
 162. (Mesenteric vein adj thrombo\*).ti,ab,kw.  
 163. exp Mesenteric Veins/

164. exp Thrombosis/  
 165. 163 and 164  
 166. 158 or 159 or 160 or 161 or 162 or 165  
 167. Portal vein thrombosis.mp.  
 168. Portal vein embolism.mp.  
 169. (Portal vein adj thrombo\*).ti,ab,kw.  
 170. exp Portal Vein/  
 171. exp Thrombosis/  
 172. 170 and 171  
 173. 167 or 168 or 169 or 172  
 174. Retinal vein thrombosis.mp.  
 175. exp Retinal Vein Occlusion/  
 176. (Retinal vein adj thrombo\*).ti,ab,kw.  
 177. exp Retinal Vein/  
 178. exp Thrombosis/  
 179. 177 and 178  
 180. 174 or 175 or 176 or 179  
 181. exp Postthrombotic Syndrome/  
 182. (post adj thrombo\*).ti,ab,kw.  
 183. Postthrombo\* Syndrome\*.mp.  
 184. 181 or 182 or 183  
 185. exp Hypertension, Pulmonary/  
 186. exp Pulmonary Embolism/ or exp Thromboembolism/  
 187. 185 and 186  
 188. (thrombo\* adj pulmonary hypertension).ti,ab,kw.  
 189. 187 or 188  
 190. (productivity adj3 loss).ti,ab,kw.  
 191. ((work adj3 lost) or (work adj3 loss)).ti,ab,kw.  
 192. sick leave/  
 193. absenteeism/  
 194. presenteeism/  
 195. return to work/  
 196. or/190-195  
 197. 128 or 135 or 140 or 144 or 152 or 157 or 166 or 173 or 180 or 184 or 189 or 196  
 198. ((cardio\* or cardiac or coronary or heart or atrium or ventricle) adj surgery).mp. [mp=title, abstract, original title, name of substance word, subject heading word, keyword heading word, protocol supplementary concept word, rare disease supplementary concept word, unique identifier]  
 199. CABG.mp.  
 200. exp Thoracic Surgery/  
 201. exp Cardiopulmonary Bypass/  
 202. cardiopulmonary bypass.mp.  
 203. cardiac surgery.mp.  
 204. exp Coronary Artery Bypass/  
 205. coronary artery bypass.mp.  
 206. exp Cardiovascular Surgical Procedures/  
 207. cardiovascular surgical procedure.mp.  
 208. 198 or 199 or 200 or 201 or 202 or 203 or 204 or 205 or 206 or 207  
 209. exp Cardiac Catheterization/  
 210. Cardiac Catheterization.mp.  
 211. exp Percutaneous Coronary Intervention/  
 212. Percutaneous Coronary Intervention.mp.  
 213. exp Angioplasty, Balloon, Coronary/  
 214. exp Coronary Angiography/  
 215. Balloon coronary angioplasty.mp.  
 216. exp Angioplasty/  
 217. angioplasty.mp.  
 218. coronary angiography.mp.

219. (coronary adj1 angioplasty).mp. [mp=title, abstract, original title, name of substance word, subject heading word, keyword heading word, protocol supplementary concept word, rare disease supplementary concept word, unique identifier]

220. 209 or 210 or 211 or 212 or 213 or 214 or 215 or 216 or 217 or 218 or 219

221. exp Renal Replacement Therapy/

222. exp Acute Kidney Injury/

223. exp Kidney Failure, Chronic/

224. acute kidney injury.mp.

225. exp Renal Insufficiency/

226. renal failure.mp.

227. Renal Insufficiency.mp.

228. exp Renal Dialysis/

229. renal dialysis.mp.

230. 221 or 222 or 223 or 224 or 225 or 226 or 227 or 228 or 229

231. exp Platelet Transfusion/

232. platelet transfusion\$1.mp. [mp=title, abstract, original title, name of substance word, subject heading word, keyword heading word, protocol supplementary concept word, rare disease supplementary concept word, unique identifier]

233. 231 or 232

234. exp Plasma Exchange/

235. exp Plasmapheresis/

236. plasma exchange\$1.mp. [mp=title, abstract, original title, name of substance word, subject heading word, keyword heading word, protocol supplementary concept word, rare disease supplementary concept word, unique identifier]

237. Plasmapheresis.mp.

238. 234 or 235 or 236 or 237

239. exp Emergency Medical Tags/

240. exp Patient Identification Systems/

241. Patient Identification System\$.mp.

242. (medical adj1 alert\$).mp. [mp=title, abstract, original title, name of substance word, subject heading word, keyword heading word, protocol supplementary concept word, rare disease supplementary concept word, unique identifier]

243. (Alert adj1 card\$1).mp. [mp=title, abstract, original title, name of substance word, subject heading word, keyword heading word, protocol supplementary concept word, rare disease supplementary concept word, unique identifier]

244. (alert adj1 bracelet\$).mp. [mp=title, abstract, original title, name of substance word, subject heading word, keyword heading word, protocol supplementary concept word, rare disease supplementary concept word, unique identifier]

245. (equipment and supplies).mp. [mp=title, abstract, original title, name of substance word, subject heading word, keyword heading word, protocol supplementary concept word, rare disease supplementary concept word, unique identifier]

246. (medical adj1 bracelet).mp. [mp=title, abstract, original title, name of substance word, subject heading word, keyword heading word, protocol supplementary concept word, rare disease supplementary concept word, unique identifier]

247. (medic\$ adj2 bracelet\$ adj2 alert\$).mp. [mp=title, abstract, original title, name of substance word, subject heading word, keyword heading word, protocol supplementary concept word, rare disease supplementary concept word, unique identifier]

248. 239 or 240 or 241 or 242 or 243 or 244 or 245 or 246 or 247

249. 208 or 220 or 230 or 233 or 238 or 248

250. exp Bandages/ or exp Compression Bandages/

251. exp Intermittent Pneumatic Compression Devices/

252. exp Mechanical Processes/

253. exp Stockings, Compression/

254. (stocking or stockings or hose or hosiery or tights or bandage).mp.

255. mechanical.mp.

256. (((calf or elastic or graded or limb or leg or pneumatic or sequential or plantar or foot) adj1 compression) or (device adj1 compression) or (foot adj1 pump\*)).mp.

257. or/250-256

258. exp Patient Education as Topic/

259. Health Education/

260. exp Patient Compliance/

261. ((patient or patients) adj3 (education or educate or educating or information or literature or leaflet\$ or booklet\$ or pamphlet\$)).mp.

262. or/258-261

263. exp Dermatan Sulfate/

264. (Dermatan Sulfate or (Chondroitin Sulfate adj B) or Dermatan Sulfphate or DS 435 or MF-701 or OP-370 or b-Heparin or Mistral or Venorix).mp.

265. 263 or 264

266. exp anticoagulant agent/

267. Anticoagula\$.mp.

268. or/266-267

269. Antithrombins.mp. or exp Antithrombins/

270. thrombin inhibitor/ or thrombin inhibitor.mp.

271. Factor Xa Inhibitors.mp. or exp Factor Xa Inhibitors/

272. rivaroxaban/ or dabigatran etexilate/ or apixaban/ or edoxaban/ or betrixaban/ or ximelagatran/

273. (rivaroxaban or Xarelto or apixaban or Eliquis or dabigatran etexilate or Edoxaban or Savaysa or Betrixaban or ximelagatran or pradaxa or lixiana or exanta or Darexaban or Otamixaban\$ or Razaxaban or Bivalirudin or Desirudin or Lepirudin or Melagatran or YM 150 or Iprivask or argatrovan or pradax or BIBR-953 or BIBR-953ZW or BAY 59-7939 or BMS-562247 or DU-176 or DU-176b).mp.

274. (TSOAC\$ or NOAC\$ or DOAC\$).ti,ab,kw.

275. ((Target adj Specific adj Oral adj Anticoagulant\$) or (oral adj anticoagulant\$) or (novel adj anticoagulant\$) or (new adj anticoagulant\$) or (direc\$ adj anticoagulant\$)).mp.

276. ((new or novel or direct or direct-acting or target-specific or targeted or non-vitamin K) adj3 oral anticoagulant\*).mp.

277. (factor Xa adj2 (antag\* or inhibit\*)).mp.

278. or/269-277

279. exp Heparin/ or heparin.mp.

280. exp Heparin, Low-Molecular-Weight/

281. dalteparin/ or enoxaparin/ or nadroparin/ or heparinoids/

282. (LMWH or LMWHs or low molecular weight heparin or nadroparin or fraxiparin\* or enoxaparin\* or clexane or klexane or lovenox or dalteparin or fragmin or ardeparin\* or normiflo or tinzaparin or logiparin or innohep or certoparin or sandoparin or reviparin or clivarin\* or danaproid or danaparoid or organan or antixarin or bemiparin\* or hibor or zibor or ivor or badyket or semuloparin or parnaparin or tedelparin or fluxum or lohepa or lowhepa or parvoparin or seleparin\* or tedelgliparin or lomoparan or organan or sulodexide or zivor or embolex or xaparin or clivarine).mp.

283. (FR-860 or FR 860 or FR860 or PK-10,169 or PK 10,169 or PK10,169 or PK-10169 or PK 10169 or PK10169 or EMT-967 or EMT 967 or EMT967 or EMT-966 or EMT 966 or EMT966 or CY 216 or CY-216 or CY216 or LMF CY-216 or LMF CY 216 or LMF CY216).mp.

284. or/279-283

285. exp Platelet Aggregation/

286. Aspirin/

287. Aminosalicilyc Acids/

288. Phosphodiesterase inhibitors/

289. Dipyridamole/

290. Thienopyridines/

291. Ticlopidine/

292. Prasugrel Hydrochloride/

293. (Platelet Aggregation or Aspirin or Aminosalicilyc Acids or Triflusal or Cilostazol or dipyridamole or Clopidogrel or Prasugrel or Ticlopidine or Tirofiban or Abciximab or Eptifibatide).mp.

294. or/285-293

295. exp 4-Hydroxycoumarins/ or warfarin/ or acenocoumarol/ or dicumarol/ or Coumarins/ or coumarin anticoagulant/ or ethyl biscoumacetate/ or phenprocoumon/ or phenindione/

296. vitamin K antagonist\$.mp.



297. (4-Hydroxycoumarins or warfarin or acenocoumarol or nicoumalone or sinthrome or Sintrom or phenindione or dicoumarol or coumadin or phenprocoumon or phepromaron or ethyl-biscoumacetate or phenindione or Diphenadione or Tiocloamarol or Racumi or Marcoumar or Marcumar or Falithrom or Coumadin or Jantoven or vitamin K antagonist\$ or VKA or fluindione or difenacoum or coumatetralyl).mp.  
 298. 295 or 296 or 297  
 299. (fondaparinux or Arixtra).mp.  
 300. exp Heparin/  
 301. (un?fract\* adj heparin).mp.  
 302. UFH.mp.  
 303. ((sodium or alpha) adj1 heparin).mp.  
 304. (Hepalean or Calcilean or Calciparine or Liquaemin or Liquemin or Multiparin or Novoheparin or Eparina or Hep-lock or Heparinate or Heparinic acid or Panheprin or Hepalean or Heparin Leo or Heparin Lock).mp.  
  
 305. or/300-304  
 306. 268 or 278 or 284 or 294 or 298 or 299 or 305  
 307. exp vena cava filter/  
 308. ven\* cava filter\*.mp.  
 309. (Celect or Greenfield or Gunther Tulip or Ninitol Bard G2 or OptEase or Trapease or Vena Tech).mp  
 310. or/307-309  
 311. Health Services/  
 312. exp Management Service Organizations/  
 313. exp Patient Care Management/  
 314. exp Managed Care Programs/  
 315. exp Ambulatory Care Facilities/ or exp Ambulatory Care/  
 316. exp Practice Patterns, Physicians'/  
 317. exp Practice Management, Medical/  
 318. exp Pharmaceutical Services/ or Pharmacists/  
 319. exp Professional Role/  
 320. anticoagul\* management\*.mp.  
 321. ((thrombosis or anticoagul\*) adj2 (service or clinic or manage\* or ambulatory)).ti,ab,kw.  
 322. 311 or 312 or 313 or 314 or 315 or 316 or 317 or 318 or 319 or 320 or 321  
 323. exp Point-of-Care Systems/  
 324. exp Self Care/  
 325. exp Self administration/  
 326. exp International Normalized Ratio/  
 327. Patient education/  
 328. exp Drug Monitoring/  
 329. ((Point-of-care or monitor\* or manage\*) adj home).mp.  
 330. (self adj1 (monitor\* or test\* or management\*)).ti,ab,kw.  
 331. ((monitor\* or test\* or management\*) adj1 home).ti,ab,kw.  
 332. 323 or 324 or 325 or 326 or 327 or 328 or 329 or 330 or 331  
 333. ultrasonography/ or ultrasonography, doppler/  
 334. (ultrasound\$ or ultrason\$ or sonograph\$).mp.  
 335. or/333-334  
 336. Fibrin Fibrinogen Degradation Products/  
 337. (D-dimer or d dimer).mp.  
 338. (label\$ adj2 (fibrinogen or fibrinogen)).mp.  
 339. 336 or 337 or 338  
 340. exp Cone-Beam Computed Tomography/  
 341. Tomography, Spiral Computed/  
 342. Tomography, X-Ray Computed/  
 343. (compute\* tomograph\* or compute\*-tomograph\*).mp.  
 344. or/340-343  
 345. exp Ventilation-Perfusion Ratio/  
 346. (lung adj1 (ventilation or perfusion)).ti,ab,kw.  
 347. (lung adj ventilation adj scan).ti,ab,kw.  
 348. (lung adj perfusion adj scan).ti,ab,kw.

349. (lung adj1 scan).ti,ab,kw.  
350. VQ scan.mp.  
351. 345 or 346 or 347 or 348 or 349 or 350  
352. 335 or 339 or 344 or 351  
353. exp Thrombolytic Therapy/  
354. exp Fibrinolytic Agents/  
355. Fibrinolysis/  
356. exp Plasminogen Activators/  
357. (plasminogen adj2 activator\*).mp. [mp=title, abstract, original title, name of substance word, subject heading word, keyword heading word, protocol supplementary concept word, rare disease supplementary concept word, unique identifier]  
358. (rt-pa or tPA).mp. [mp=title, abstract, original title, name of substance word, subject heading word, keyword heading word, protocol supplementary concept word, rare disease supplementary concept word, unique identifier]  
359. tissue plasminogen activator/ or urokinase-type plasminogen activator/  
360. (Urokinase\* or alteplase\* or reteplase\* or tenecteplase\* or saruplase\* or anistreplase\* or monteplase\* or streptokinase\* or staphylokinase or avelizin or awelysin or celiase\* or distreptase\* or Kabikinase\* or kabivitrin 22 or Streptase\* or streptodecase\* or apsac or Abbokinase\* or renokinase\* or Actilyse\* or Activase\* or Eminase\* or Retavase\* or Rapilysin or desmopletase\* or u-pa or alfineprase\* or thromboly\* or fibrinoly\* or antithrombotic or antithrombic).mp. [mp=title, abstract, original title, name of substance word, subject heading word, keyword heading word, protocol supplementary concept word, rare disease supplementary concept word, unique identifier]  
361. or/353-360  
362. 257 or 262 or 265 or 306 or 310 or 322 or 332 or 352 or 361  
363. 249 or 362  
364. 197 or 363  
365. 107 and 125 and 364  
366. 84 and 125 and 364  
367. 40 and 125 and 364  
368. 65 and 125 and 364  
369. (97 or 106) and 125 and 364  
370. 367 not 366  
371. 368 not (366 or 367)  
372. 369 not (366 or 367 or 368)

1. Database: EMBASE

Interface: Ovid

Search Strategy: search terms

1. \*Attitude to Health/
2. \*Patient Participation/
3. preference\*.ti,ab.
4. \*Patient Preference/
5. choice.ti.
6. choices.ti.
7. value\*.ti.
8. health state values.ti,ab.
9. valuation\*.ti.
10. expectation\*.ti,ab.
11. attitude\*.ti,ab.
12. acceptab\*.ti,ab.
13. knowledge.ti,ab.
14. point of view.ti,ab.
15. user participation.ti,ab.
16. users participation.ti,ab.
17. users' participation.ti,ab.
18. user's participation.ti,ab.
19. patient participation.ti,ab.
20. patients' participation.ti,ab.
21. patients participation.ti,ab.
22. patient's participation.ti,ab.
23. patient perspective\*.ti,ab.
24. patients perspective\*.ti,ab.
25. patients' perspective\*.ti,ab.
26. patient's perspective\*.ti,ab.
27. patient perce\*.ti,ab.
28. patients perce\*.ti,ab.
29. patients' perce\*.ti,ab.
30. patient's perce\*.ti,ab.
31. health perception\*.ti,ab.
32. user view\*.ti,ab.
33. users view\*.ti,ab.
34. users' view\*.ti,ab.
35. user's view\*.ti,ab.
36. patient view\*.ti,ab.
37. patients view\*.ti,ab.
38. patients' view\*.ti,ab.
39. patient's view\*.ti,ab.
40. or/1-39
41. patient\*.ti.
42. user\*.ti.
43. men.ti.
44. women.ti.
45. or/41-44
46. exp \*Decision Making/
47. decision mak\*.ti,ab.
48. decisions mak\*.ti,ab.
49. decision\*.ti.
50. mak\*.ti.
51. 49 and 50
52. avoidance behavior/
53. 46 or 47 or 48 or 51 or 52
54. 45 and 53

55. discrete choice.ti,ab.  
56. decision board\*.ti,ab.  
57. decision analy\*.ti,ab.  
58. decision-support.ti,ab.  
59. decision tool\*.ti,ab.  
60. decision aid\*.ti,ab.  
61. discrete-choice\*.ti,ab.  
62. decision\*.ti,ab.  
63. 55 or 56 or 57 or 58 or 59 or 60 or 61 or 62  
64. 45 and 63  
65. 54 or 64  
66. decision support techniques/  
67. (health and utilit\*).ti.  
68. gamble\*.ti,ab.  
69. prospect theory.ti,ab.  
70. preference score.ti,ab.  
71. preference elicitation.ti,ab.  
72. health utilit\*.ti,ab.  
73. (utility and (value\* or score\* or estimate\*)).mp. [mp=title, abstract, heading word, drug trade name, original title, device manufacturer, drug manufacturer, device trade name, keyword]  
74. health state.ti,ab.  
75. feeling thermometer\*.ti,ab.  
76. best-worst scaling.ti,ab.  
77. best worst scaling.mp.  
78. best worst.ti,ab.  
79. TTO.ti,ab.  
80. time trade-off.ti,ab.  
81. probability trade-off.ti,ab.  
82. or/66-81  
83. Choice Behavior/  
84. or/66-83  
85. decision support system/  
86. decision making/  
87. patient decision making/  
88. family decision making/  
89. or/66-88  
90. preference based.ti,ab.  
91. preference score.ti,ab.  
92. multiattribute.ti,ab.  
93. multi attribute.mp.  
94. EuroQoL 5D.mp.  
95. EuroQoL5D.ti,ab.  
96. EQ5D.mp.  
97. EQ 5D.ti,ab.  
98. SF6D.ti,ab.  
99. SF 6D.ti,ab.  
100. HUI.ti,ab.  
101. 15D.ti,ab.  
102. or/90-101  
103. SF36.ti,ab.  
104. SF 36.ti,ab.  
105. SF12.ti,ab.  
106. SF 12.mp.  
107. HRQoL.ti,ab.  
108. QoL.ti,ab.  
109. quality of life.ti,ab.  
110. exp "quality of Life"/

111. or/103-110  
 112. 40 or 65 or 89 or 102 or 111  
 113. exp vein thrombosis/  
 114. exp Venous Thromboembolism/  
 115. exp 'lung embolism'/  
 116. Thrombophlebitis/  
 117. (PE or DVT or VTE).mp.  
 118. ((Pulmon\$ or vein or venous or lung) adj (Emboli\$ or thromb\$)).mp.  
 119. (thrombus\* or thrombotic\* or thrombolic\* or thromboemboli\* or thrombos\* or embol\*).mp.  
 120. (((deep or thromb\* or stasis) adj2 (vein\* or venous)) or (blood flow stasis or blood clot)).mp.  
 121. or/113-120  
 122. exp Thrombocytopenia/  
 123. thrombocytopen\*.mp.  
 124. or/122-123  
 125. (heparin\* or acute or secondary or isolated).mp.  
 126. 124 and 125  
 127. ((Heparin adj2 thrombocytopenia) or Heparin-induced thrombocytopenia or (acute adj3 thrombocytopenia) or isolated thrombocytopenia).mp.  
 128. ((HIT or HITT) and (prothromb\* or thromb\* or heparin\*)).mp.  
 129. or/126-128  
 130. 121 or 129  
 131. exp bleeding/  
 132. (bleed\$ or hemorrhage or haemorrhage or bloodloss\$ or blood loss\$).ti,ab,kw.  
 133. 131 or 132  
 134. exp cerebral sinus thrombosis/  
 135. exp occlusive cerebrovascular disease/  
 136. brain embolism/  
 137. ((cerebral vein or cerebral venous or sinus or intracranial) adj thrombo\*).ti,ab,kw.  
 138. ((intracranial or cerebral) adj embolism).ti,ab,kw.  
 139. 134 or 135 or 136 or 137 or 138  
 140. brain hemorrhage/  
 141. ((cerebral or intracerebral or intracranial or brain) adj1 (hemorrhag\* or haemorrhag\* or bleed\*)).ti,ab,kw.  
 142. ((hemorrhag\* or haemorrhag\*) adj1 stroke).ti,ab,kw.  
 143. 140 or 141 or 142  
 144. exp hospitalization/  
 145. hospitali?ation.ti,ab,kw.  
 146. (hospital stay or ("length of stay" adj hospital)).ti,ab,kw.  
 147. 144 or 145 or 146  
 148. exp Apontaneous abortion/  
 149. exp embryo death/  
 150. fetus death/ or fetus resorption/ or stillbirth/  
 151. pregnancy outcome/  
 152. pregnancy complication/  
 153. (((fetal or fetus or foetus or pregnancy or embryo) adj1 (loss or death)) or miscarr\*).ti,ab,kw.  
 154. or/148-153  
 155. exp allergic reaction/  
 156. contrast medium/  
 157. 155 and 156  
 158. ((Allerg\* adj reaction\*) and (contrast adj dye\*)).ti,ab,kw.  
 159. 157 or 158  
 160. exp mesenteric blood vessel occlusion/  
 161. Mesenteric vein thrombosis.mp.  
 162. Mesenteric venous thrombosis.mp.  
 163. exp mesenteric ischemia/  
 164. (Mesenteric vein adj thrombo\*).ti,ab,kw.  
 165. exp Mesenteric Veins/

166. exp Thrombosis/  
 167. 165 and 166  
 168. 160 or 161 or 162 or 163 or 164 or 167  
 169. exp portal vein thrombosis/  
 170. Portal vein thrombosis.mp.  
 171. Portal vein embolism.mp.  
 172. (Portal vein adj thrombo\*).ti,ab,kw.  
 173. exp Portal Vein/  
 174. exp Thrombosis/  
 175. 173 and 174  
 176. 169 or 170 or 171 or 172 or 175  
 177. (productivity adj3 loss).ti,ab,kw.  
 178. ((work adj3 lost) or (work adj3 loss)).ti,ab,kw.  
 179. medical leave/  
 180. absenteeism/  
 181. return to work/  
 182. work resumption/  
 183. or/177-182  
 184. Retinal vein thrombosis.mp.  
 185. exp Retinal Vein Occlusion/  
 186. (Retinal vein adj thrombo\*).ti,ab,kw.  
 187. exp Retinal Vein/  
 188. exp Thrombosis/  
 189. 187 and 188  
 190. 184 or 185 or 186 or 189  
 191. exp Postthrombotic Syndrome/  
 192. postthrombosis syndrome/  
 193. (post adj thrombo\*).ti,ab,kw.  
 194. Postthrombo\* Syndrome\*.mp.  
 195. 191 or 192 or 193 or 194  
 196. exp Hypertension, Pulmonary/  
 197. exp chronic thromboembolic pulmonary hypertension/  
 198. ((thrombo\* or embol\*) adj pulmonary hypertension).ti,ab,kw.  
 199. 197 or 198  
 200. 196 and 199  
 201. 133 or 139 or 143 or 147 or 154 or 159 or 168 or 176 or 183 or 190 or 195 or 200  
 202. exp plasmapheresis/  
 203. Plasma Exchange\$.mp.  
 204. 202 or 203  
 205. ((cardio\* or cardiac or coronary or heart or atrium or ventricle) adj surgery).mp. [mp=title, abstract, heading word, drug trade name, original title, device manufacturer, drug manufacturer, device trade name, keyword]  
 206. CABG.mp.  
 207. exp cardiovascular surgery/  
 208. cardiovascular surgical procedure\$.mp.  
 209. exp coronary artery bypass graft/  
 210. exp coronary artery surgery/  
 211. coronary artery bypass.mp.  
 212. coronary artery surgery.mp.  
 213. exp cardiopulmonary bypass/ or exp extracorporeal circulation/  
 214. cardiopulmonary bypass.mp.  
 215. extracorporeal circulation.mp.  
 216. thorax surgery/ or exp heart surgery/  
 217. cardiac surgery.mp.  
 218. 205 or 206 or 207 or 208 or 209 or 210 or 211 or 212 or 213 or 214 or 215 or 216 or 217  
 219. exp heart catheterization/  
 220. Cardiac Catheterization.mp.

221. exp percutaneous coronary intervention/ or exp interventional cardiovascular procedure/ or exp transluminal coronary angioplasty/  
222. exp interventional cardiovascular procedure/  
223. exp percutaneous coronary intervention/  
224. (coronary adj1 angioplasty).mp. [mp=title, abstract, heading word, drug trade name, original title, device manufacturer, drug manufacturer, device trade name, keyword]  
225. Percutaneous Coronary Intervention.mp.  
226. 219 or 220 or 221 or 222 or 223 or 224 or 225  
227. exp thrombocyte transfusion/  
228. platelet transfusion\$.mp.  
229. thrombocyte transfusion\$.mp.  
230. 227 or 228 or 229  
231. exp renal replacement therapy/  
232. renal replacement therapy.mp.  
233. 231 or 232  
234. exp kidney failure/  
235. kidney failure.mp.  
236. 234 or 235  
237. 233 or 236  
238. (Alert adj1 card\$1).mp. [mp=title, abstract, heading word, drug trade name, original title, device manufacturer, drug manufacturer, device trade name, keyword]  
239. exp emergency health service/  
240. medical alert\$.mp.  
241. exp hospital information system/  
242. alert bracelet\$.mp.  
243. electronic tag\$.mp.  
244. human/  
245. 243 and 244  
246. 238 or 239 or 240 or 241 or 242 or 243 or 244 or 245  
247. exp patient safety/  
248. patient safety.mp. or patient safety/  
249. 247 or 248  
250. 246 or 249  
251. 204 or 218 or 226 or 230 or 237 or 250  
252. exp bandage/  
253. exp intermittent pneumatic compression device/  
254. exp compression stocking/  
255. (((calf or elastic or graded or limb or leg or pneumatic or sequential or plantar or foot) adj1 compression) or (device adj1 compression) or (foot adj1 pump\*)).mp.  
256. mechanical.mp.  
257. (stocking or stockings or hose or hosiery or tights or bandage).mp.  
258. or/252-257  
259. exp Patient Education as Topic/  
260. Health Education/  
261. exp Patient Compliance/  
262. ((patient or patients) adj3 (education or educate or educating or information or literature or leaflet\$ or booklet\$ or pamphlet\$)).mp.  
263. or/259-262  
264. exp Dermatan Sulfate/  
265. (Dermatan Sulfate or (Chondroitin Sulfate adj B) or Dermatan Sulfphate or DS 435 or MF-701 or OP-370 or b-Heparin or Mistral or Venorix).mp.  
266. or/264-265  
267. exp antithrombin/ or Antithrombins.mp.  
268. thrombin inhibitor/ or thrombin inhibitor.mp.  
269. Factor Xa Inhibitors.mp. or exp blood clotting factor 10a inhibitor/  
270. rivaroxaban/ or dabigatran etexilate/ or apixaban/ or edoxaban/ or betrixaban/ or ximelagatran/ or Darexaban/ or Otamixaban/ or Razaxaban/ or Bivalirudin/ or Desirudin/ or Lepirudin/ or Melagatran/

271. (rivaroxaban or Xarelto or apixaban or Eliquis or dabigatran etexilate or Edoxaban or Savaysa or Betrixaban or ximelagatran or pradaxa or lixiana or exanta or Darexaban or Otamixaban\$ or Razaxaban or Bivalirudin or Desirudin or Lepirudin or Melagatran or YM 150 or Iprivask or argatrovan or pradax or BBR-953 or BBR-953ZW or BAY 59-7939 or BMS-562247 or DU-176 or DU-176b).mp.

272. (TSOAC\$ or NOAC\$ or DOAC\$).ti,ab,kw.

273. ((Target adj Specific adj Oral adj Anticoagulant\$) or (oral adj anticoagulant\$) or (novel adj anticoagulant\$) or (new adj anticoagulant\$) or (direc\$ adj anticoagulant\$)).mp.

274. ((new or novel or direct or direct-acting or target-specific or targeted or non-vitamin K) adj3 oral anticoagulant\*).mp.

275. (factor Xa adj2 (antag\* or inhibit\*)).mp.

276. or/267-275

277. exp 4 hydroxycoumarin/ or exp 4 hydroxycoumarin derivative/

278. warfarin/

279. acenocoumarol/

280. coumarin/ or coumarin derivative/

281. phenindione/

282. dicoumarol derivative/ or dicoumarol/

283. phenprocoumon/

284. phepromaron/

285. ethyl biscoumacetate/

286. fluindione/ or difenacoum/ or coumatetralyl/

287. vitamin K antagonist.mp. or antivitamin K/

288. (4 hydroxycoumarin or warfarin or acenocoumarol or nicoumalone or sinthrome or Sintrom or phenindione or dicoumarol or coumadin or phenprocoumon or phepromaron or ethyl-biscoumacetate or phenindione or Diphenadione or Tioclomarol or Racumi or Marcoumar or Marcumar or Falithrom or Coumadin or Jantoven or vitamin K antagonist\$ or VKA or fluindione or difenacoum or coumatetralyl).mp.

289. or/277-288

290. exp anticoagulant agent/

291. Anticoagula\$.mp.

292. 290 or 291

293. exp Platelet Aggregation/

294. Aspirin/

295. Aminosalicyclic Acids/

296. triflusal/

297. Phosphodiesterase inhibitors/

298. Dipyridamole/

299. cilostazol/

300. Thienopyridines/

301. clopidogrel/

302. prasugrel/

303. Ticlopidine/

304. Abciximab/

305. Eptifibatide/

306. Tirofiban/

307. (Platelet Aggregation or Aspirin or Aminosalicyclic Acids or Triflusal or Cilostazol or dipyridamole or Clopidogrel or Prasugrel or Ticlopidine or Tirofiban or Abciximab or Eptifibatide).mp.

308. 293 or 294 or 295 or 296 or 297 or 298 or 299 or 300 or 301 or 302 or 303 or 304 or 305 or 306 or 307

309. (fondaparinux or Arixtra).mp.

310. exp Heparin/

311. (un?fract\* adj heparin).mp.

312. UFH.mp.

313. ((sodium or alpha) adj1 heparin).mp.

314. (Hepalean or Calcilean or Calciparine or Liquaemin or Liquemin or Multiparin or Novoheparin or Eparina or Hep-lock or Heparinate or Heparinic acid or Panheprin or Hepalean or Heparin Leo or Heparin Lock).mp.

315. or/310-314



316. exp heparin derivative/ or heparin\*.mp.  
317. nadroparin/  
318. enoxaparin/  
319. dalteparin/  
320. ardeparin/  
321. tinzaparin/  
322. certoparin/  
323. reviparin/  
324. danaparoid/  
325. (LMWH or LMWHs or low molecular weight heparin or nadroparin or fraxiparin\* or enoxaparin\* or clexane or klexane or lovenox or dalteparin or fragmin or ardeparin\* or normiflo or tinzaparin or logiparin or innohep or certoparin or sandoparin or reviparin or clivarin\* or danaproid or danaparoid or orgaran or antixarin or bemiparin\* or hibor or zibor or ivor or badyket or semuloparin or parnaparin or tedelparin or fluxum or lohepa or lowhepa or parvoparin or seleparin\* or tedelgliparin or lomoparan or orgaran or sulodexide or zivor or embolex or xaparin or clivarine).mp.  
326. (FR-860 or FR 860 or FR860 or PK-10,169 or PK 10,169 or PK10,169 or PK-10169 or PK 10169 or PK10169 or EMT-967 or EMT 967 or EMT967 or EMT-966 or EMT 966 or EMT966 or CY 216 or CY-216 or CY216 or LMF CY-216 or LMF CY 216 or LMF CY216).mp.  
327. or/316-326  
328. 276 or 289 or 292 or 308 or 309 or 315 or 327  
329. exp vena cava filter/  
330. ven\* cava filter\*.mp.  
331. (Celect or Greenfield or Gunther Tulip or Ninitol Bard G2 or OptEase or Trapease or Vena Tech).mp.  
332. or/329-331  
333. health service/  
334. "organization and management"/  
335. exp patient care/  
336. exp ambulatory care/  
337. exp health program/ or exp health care delivery/  
338. exp ambulatory care/  
339. exp medical practice/  
340. exp pharmaceutical care/ or Pharmacists/  
341. exp professional standard/  
342. anticoagul\* management\*.mp.  
343. ((thrombosis or anticoagul\*) adj2 (service or clinic or manage\* or ambulatory)).ti,ab,kw.  
344. 333 or 334 or 335 or 336 or 337 or 338 or 339 or 340 or 341 or 342 or 343  
345. exp hospital information system/  
346. exp self care/  
347. exp drug monitoring/  
348. ((Point-of-care or monitor\* or manage\*) adj home).mp.  
349. (self adj1 (monitor\* or test\* or management\*)).ti,ab,kw.  
350. ((monitor\* or test\* or management\*) adj1 home).ti,ab,kw.  
351. International Normalized Ratio/  
352. exp drug self administration/  
353. patient education/  
354. 345 or 346 or 347 or 348 or 349 or 350 or 351 or 352 or 353  
355. ultrasonography/ or ultrasonography, doppler/  
356. (ultrasound\$ or ultrason\$ or sonograph\$).mp.  
357. 355 or 356  
358. fibrin degradation product/  
359. D dimer/  
360. (D-dimer or d dimer).mp.  
361. (label\$ adj2 (fibrinogen or fibrinogen)).mp.  
362. 358 or 359 or 360 or 361  
363. exp cone beam computed tomography/  
364. spiral computer assisted tomography/  
365. computer assisted tomography/

366. (compute\* tomograph\* or compute\*-tomograph\*).mp.  
 367. or/363-366  
 368. exp lung scintiscanning/  
 369. exp Ventilation-Perfusion Ratio/  
 370. (lung adj1 (ventilation or perfusion)).ti,ab,kw.  
 371. (lung adj ventilation adj scan).ti,ab,kw.  
 372. (lung adj perfusion adj scan).ti,ab,kw.  
 373. (lung adj1 scan).ti,ab,kw.  
 374. VQ scan.mp.  
 375. 368 or 369 or 370 or 371 or 372 or 373 or 374  
 376. 355 or 356 or 357 or 358 or 359 or 360 or 361 or 362 or 363 or 364 or 365 or 366 or 367 or 368 or 369  
 or 370 or 371 or 372 or 373 or 374 or 375  
 377. fibrinolytic therapy/  
 378. fibrinolytic agent/  
 379. exp fibrinolysis/  
 380. exp plasminogen activator/  
 381. (Urokinase\* or alteplase\* or reteplase\* or tenecteplase\* or saruplase\* or anistreplase\* or monteplase\*  
 or streptokinase\* or staphylokinase or avelizin or awelysin or celiase\* or distreptase\* or Kabikinase\* or  
 kabivitrum 22 or Streptase\* or streptodecase\* or apnac or Abbokinase\* or renokinase\* or Actilyse\* or  
 Activase\* or Eminase\* or Retavase\* or Rapiysin or desmopletase\* or u-pa or alfineprase\* or thromboly\* or  
 fibrinoly\* or antithrombotic or antithrombic).mp. [mp=title, abstract, heading word, drug trade name,  
 original title, device manufacturer, drug manufacturer, device trade name, keyword]  
 382. or/377-381  
 383. 258 or 263 or 266 or 328 or 332 or 344 or 354 or 376 or 382  
 384. 251 or 383  
 385. 201 or 384  
 386. 112 and 130 and 385  
 387. 89 and 130 and 385  
 388. 40 and 130 and 385  
 389. 65 and 130 and 385  
 390. (102 or 111) and 130 and 385  
 391. limit 386 to embase  
 392. limit 387 to embase  
 393. limit 388 to embase  
 394. limit 389 to embase  
 395. limit 390 to embase

2. Database: PSYCINFO

Interface: Ovid

Search Strategy: search terms

1. \*Health Attitudes/
2. \*Client Participation/
3. preference\*.ti,ab.
4. exp Preferences/ or exp Client Attitudes/
5. choice.ti.
6. choices.ti.
7. value\*.ti.
8. health state values.ti,ab.
9. valuation\*.ti.
10. expectation\*.ti,ab.
11. attitude\*.ti,ab.
12. acceptab\*.ti,ab.
13. knowledge.ti,ab.
14. point of view.ti,ab.
15. user participation.ti,ab.
16. users participation.ti,ab.
17. users' participation.ti,ab.
18. user's participation.ti,ab.
19. patient participation.ti,ab.
20. patients' participation.ti,ab.
21. patients participation.ti,ab.
22. patient's participation.ti,ab.
23. patient perspective\*.ti,ab.
24. patients perspective\*.ti,ab.
25. patients' perspective\*.ti,ab.
26. patient's perspective\*.ti,ab.
27. patient perce\*.ti,ab.
28. patients perce\*.ti,ab.
29. patients' perce\*.ti,ab.
30. patient's perce\*.ti,ab.
31. health perception\*.ti,ab.
32. user view\*.ti,ab.
33. users view\*.ti,ab.
34. users' view\*.ti,ab.
35. user's view\*.ti,ab.
36. patient view\*.ti,ab.
37. patients view\*.ti,ab.
38. patients' view\*.ti,ab.
39. patient's view\*.ti,ab.
40. or/1-39
41. patient\*.ti.
42. user\*.ti.
43. men.ti.
44. women.ti.
45. or/41-44
46. \*decision making/
47. decision mak\*.ti,ab.
48. decisions mak\*.ti,ab.
49. decision\*.ti.
50. mak\*.ti.
51. 49 and 50
52. exp Avoidance Conditioning/
53. 46 or 47 or 48 or 51 or 52
54. 45 and 53

55. discrete choice.ti,ab.  
56. decision board\*.ti,ab.  
57. decision analy\*.ti,ab.  
58. decision-support.ti,ab.  
59. decision tool\*.ti,ab.  
60. decision aid\*.ti,ab.  
61. discrete-choice\*.ti,ab.  
62. decision\*.ti,ab.  
63. 55 or 56 or 57 or 58 or 59 or 60 or 61 or 62  
64. 45 and 63  
65. 54 or 64  
66. exp Decision Support Systems/ or exp Decision Making/  
67. (health and utilit\*).ti.  
68. gamble\*.ti,ab.  
69. exp Prospect Theory/ or prospect theory.mp.  
70. preference score.ti,ab.  
71. preference elicitation.ti,ab.  
72. health utilit\*.ti,ab.  
73. (utility and (value\* or score\* or estimate\*)).mp.  
74. health state.ti,ab.  
75. feeling thermometer\*.ti,ab.  
76. best-worst scaling.ti,ab.  
77. best worst scaling.mp.  
78. best worst.ti,ab.  
79. TTO.ti,ab.  
80. time trade-off.ti,ab.  
81. probability trade-off.ti,ab.  
82. or/66-81  
83. choice behavior/  
84. or/66-83  
85. preference based.ti,ab.  
86. preference score.ti,ab.  
87. multiattribute.ti,ab.  
88. multi attribute.mp.  
89. EuroQoL 5D.mp.  
90. EuroQoL5D.ti,ab.  
91. EQ5D.mp.  
92. EQ 5D.ti,ab.  
93. SF6D.ti,ab.  
94. SF 6D.ti,ab.  
95. HUI.ti,ab.  
96. 15D.ti,ab.  
97. or/85-96  
98. SF36.ti,ab.  
99. SF 36.ti,ab.  
100. SF12.ti,ab.  
101. SF 12.mp.  
102. HRQoL.ti,ab.  
103. QoL.ti,ab.  
104. quality of life.ti,ab.  
105. "quality of life"/  
106. or/98-105  
107. 40 or 65 or 84 or 97 or 106  
108. exp Thromboses/ or Embolisms/  
109. Embolism\*.mp.  
110. Thromboembolism\*.mp.  
111. Thrombophlebitis.mp.

112. DVT.mp.  
113. VTE.mp.  
114. (PE and (vein or venous)).mp. [mp=title, abstract, heading word, table of contents, key concepts, original title, tests & measures]  
115. ((Pulmon\$ or vein or venous or lung) adj (Emboli\$ or thromb\$)).mp. [mp=title, abstract, heading word, table of contents, key concepts, original title, tests & measures]  
116. (thrombus\* or thrombotic\* or thrombolic\* or thromboemboli\* or thrombos\* or embol\*).mp. [mp=title, abstract, heading word, table of contents, key concepts, original title, tests & measures]  
117. (((deep or thromb\* or stasis) adj2 (vein\* or venous)) or (blood flow stasis or blood clot)).mp. [mp=title, abstract, heading word, table of contents, key concepts, original title, tests & measures]  
118. or/108-117  
119. thrombocytopen\*.mp. [mp=title, abstract, heading word, table of contents, key concepts, original title, tests & measures]  
120. Heparin-induced.mp.  
121. HITT.mp.  
122. ((HIT or HITT) and (prothromb\* or thromb\* or heparin\*)).mp. [mp=title, abstract, heading word, table of contents, key concepts, original title, tests & measures]  
123. or/108-122

### 3. Database: CINAHL

Interface: EBSCOhost

Search Strategy: search terms

|      |                                                                                                                            |
|------|----------------------------------------------------------------------------------------------------------------------------|
| S107 | S40 OR S65 OR S84 OR S97 OR S106                                                                                           |
| S106 | S98 OR S99 OR S100 OR S101 OR S102 OR S103 OR S104 OR S105                                                                 |
| S105 | (MH "Quality of Life")                                                                                                     |
| S104 | TX quality of life                                                                                                         |
| S103 | TX QoL                                                                                                                     |
| S102 | TX HRQoL                                                                                                                   |
| S101 | TX SF 12                                                                                                                   |
| S100 | TX SF12                                                                                                                    |
| S99  | TX SF 36                                                                                                                   |
| S98  | TX SF36                                                                                                                    |
| S97  | S85 OR S86 OR S87 OR S88 OR S89 OR S90 OR S91 OR S92 OR S93 OR S94 OR S95 OR S96                                           |
| S96  | TX 15D                                                                                                                     |
| S95  | TX HUI                                                                                                                     |
| S94  | TX SF 6D                                                                                                                   |
| S93  | TX SF6D                                                                                                                    |
| S92  | TX EQ 5D                                                                                                                   |
| S91  | TX EQ5D                                                                                                                    |
| S90  | TX EuroQoL5D                                                                                                               |
| S89  | TX EuroQoL 5D                                                                                                              |
| S88  | TX multi attribute                                                                                                         |
| S87  | TX multiattribute                                                                                                          |
| S86  | TX preference score                                                                                                        |
| S85  | TX preference based                                                                                                        |
| S84  | S66 OR S67 OR S68 OR S69 OR S70 OR S71 OR S72 OR S73 OR S74 OR S75 OR S76 OR S77 OR S78 OR S79 OR S80 OR S81 OR S82 OR S83 |
| S83  | "Choice Behavior"                                                                                                          |
| S82  | S66 OR S67 OR S68 OR S69 OR S70 OR S71 OR S72 OR S73 OR S74 OR S75 OR S76 OR S77 OR S78 OR S79 OR S80 OR S81               |
| S81  | TX probability trade-off                                                                                                   |
| S80  | TX time trade-off                                                                                                          |
| S79  | TX TTO                                                                                                                     |
| S78  | TX best worst                                                                                                              |
| S77  | TX best worst scaling                                                                                                      |
| S76  | TX best-worst scaling                                                                                                      |
| S75  | TX feeling thermometer*                                                                                                    |
| S74  | TX health state                                                                                                            |
| S73  | TX (utility and (value* or score* or estimate*))                                                                           |
| S72  | TX health utilit*                                                                                                          |
| S71  | TX preference elicitation                                                                                                  |
| S70  | TX preference score                                                                                                        |
| S69  | TX prospect theory                                                                                                         |
| S68  | TX gamble*                                                                                                                 |
| S67  | TI health and utilit*                                                                                                      |
| S66  | (MH "Decision Support Techniques")                                                                                         |
| S65  | S54 OR S64                                                                                                                 |
| S64  | S45 AND S63                                                                                                                |
| S63  | S55 OR S56 OR S57 OR S58 OR S59 OR S60 OR S61 OR S62                                                                       |
| S62  | TX decision*                                                                                                               |
| S61  | TX discrete-choice*                                                                                                        |
| S60  | TX decision aid*                                                                                                           |
| S59  | TX decision tool*                                                                                                          |
| S58  | TX decision-support                                                                                                        |
| S57  | TX decision analy*                                                                                                         |
| S56  | TX decision board*                                                                                                         |

|     |                                                                                                                                                                                                                                                                      |
|-----|----------------------------------------------------------------------------------------------------------------------------------------------------------------------------------------------------------------------------------------------------------------------|
| S55 | TX discrete choice                                                                                                                                                                                                                                                   |
| S54 | S45 AND S53                                                                                                                                                                                                                                                          |
| S53 | S46 OR S47 OR S48 OR S51 OR S52                                                                                                                                                                                                                                      |
| S52 | "avoidance learning"                                                                                                                                                                                                                                                 |
| S51 | S49 AND S50                                                                                                                                                                                                                                                          |
| S50 | TI mak*                                                                                                                                                                                                                                                              |
| S49 | TI decision*                                                                                                                                                                                                                                                         |
| S48 | TI decisions mak*                                                                                                                                                                                                                                                    |
| S47 | TX decision mak*                                                                                                                                                                                                                                                     |
| S46 | (MM "Decision Making+")                                                                                                                                                                                                                                              |
| S45 | S41 OR S42 OR S43 OR S44                                                                                                                                                                                                                                             |
| S44 | TI women                                                                                                                                                                                                                                                             |
| S43 | TI men                                                                                                                                                                                                                                                               |
| S42 | TI user*                                                                                                                                                                                                                                                             |
| S41 | TI patient*                                                                                                                                                                                                                                                          |
| S40 | S1 OR S2 OR S3 OR S4 OR S5 OR S6 OR S7 OR S8 OR S9 OR S10 OR S11 OR S12 OR S13 OR S14 OR S15 OR S16 OR S17 OR S18 OR S19 OR S20 OR S21 OR S22 OR S23 OR S24 OR S25 OR S26 OR S27 OR S28 OR S29 OR S30 OR S31 OR S32 OR S33 OR S34 OR S35 OR S36 OR S37 OR S38 OR S39 |
| S39 | TX patient's view*                                                                                                                                                                                                                                                   |
| S38 | TX patients' view*                                                                                                                                                                                                                                                   |
| S37 | TX patients view*                                                                                                                                                                                                                                                    |
| S36 | TX patient view*                                                                                                                                                                                                                                                     |
| S35 | TX user's view*                                                                                                                                                                                                                                                      |
| S34 | TX users' view*                                                                                                                                                                                                                                                      |
| S33 | TX users view*                                                                                                                                                                                                                                                       |
| S32 | TX user view*                                                                                                                                                                                                                                                        |
| S31 | TX health perception*                                                                                                                                                                                                                                                |
| S30 | TX patient's perce*                                                                                                                                                                                                                                                  |
| S29 | TX patients' perce*                                                                                                                                                                                                                                                  |
| S28 | TX patients perce*                                                                                                                                                                                                                                                   |
| S27 | TX patient perce*                                                                                                                                                                                                                                                    |
| S26 | TX patient's perspective*                                                                                                                                                                                                                                            |
| S25 | TX patients' perspective*                                                                                                                                                                                                                                            |
| S24 | TX patients perspective*                                                                                                                                                                                                                                             |
| S23 | TX patient perspective*                                                                                                                                                                                                                                              |
| S22 | TX patient's participation                                                                                                                                                                                                                                           |
| S21 | TX patients participation                                                                                                                                                                                                                                            |
| S20 | TX patients' participation                                                                                                                                                                                                                                           |
| S19 | TX patient participation                                                                                                                                                                                                                                             |
| S18 | TX user's participation                                                                                                                                                                                                                                              |
| S17 | TX users' participation                                                                                                                                                                                                                                              |
| S16 | TX users participation                                                                                                                                                                                                                                               |
| S15 | TX user participation                                                                                                                                                                                                                                                |
| S14 | TX point of view                                                                                                                                                                                                                                                     |
| S13 | TX knowledge                                                                                                                                                                                                                                                         |
| S12 | TX acceptab*                                                                                                                                                                                                                                                         |
| S11 | TX attitude*                                                                                                                                                                                                                                                         |
| S10 | TX expectation*                                                                                                                                                                                                                                                      |
| S9  | TI valuation*                                                                                                                                                                                                                                                        |
| S8  | TX health state values                                                                                                                                                                                                                                               |
| S7  | TI value*                                                                                                                                                                                                                                                            |
| S6  | TI choices                                                                                                                                                                                                                                                           |
| S5  | TI choice                                                                                                                                                                                                                                                            |
| S4  | "Patient Preference"                                                                                                                                                                                                                                                 |
| S3  | TX preference*                                                                                                                                                                                                                                                       |
| S2  | (MM "Consumer Participation")                                                                                                                                                                                                                                        |
| S1  | (MM "Attitude to Health")                                                                                                                                                                                                                                            |





Table 1S. Selection criteria

|                                 | <b>INCLUSION</b>                                                                                                                                                                                                                                                                                                                                                                                                                                                                                                                                                                                                                                                                                                  | <b>EXCLUSION</b>                                                                                                                                                                                                                                                                                                                                                                                         |
|---------------------------------|-------------------------------------------------------------------------------------------------------------------------------------------------------------------------------------------------------------------------------------------------------------------------------------------------------------------------------------------------------------------------------------------------------------------------------------------------------------------------------------------------------------------------------------------------------------------------------------------------------------------------------------------------------------------------------------------------------------------|----------------------------------------------------------------------------------------------------------------------------------------------------------------------------------------------------------------------------------------------------------------------------------------------------------------------------------------------------------------------------------------------------------|
| <b>Study characteristic</b>     | RCT, Observational studies (cross-sectional, cohorts, case-controls), qualitative studies                                                                                                                                                                                                                                                                                                                                                                                                                                                                                                                                                                                                                         | non-primary studies (e.g. clinical practice guidelines, reviews, commentaries, communications, letters, or viewpoints), case report, and case series; as well as studies reporting health related quality of life studies not reporting utility information and health economic evaluation studies including cost-effectiveness analysis and cost utility analysis without original utility elicitation. |
| <b>Patient characteristic</b>   | Individuals at risk or with a VTE disease with the following characteristics:<br>Surgical, medically ill patients and patients with cancer at risk of thromboembolic disease, patients in treatment for VTE, patients with Heparin-Induced-Thrombocytopenia, with thrombophilia and pregnant women with VTE or at risk (adults and pediatric)                                                                                                                                                                                                                                                                                                                                                                     | Patients with any other condition not mentioned in inclusion criteria                                                                                                                                                                                                                                                                                                                                    |
| <b>Intervention/ Comparison</b> | Mechanical Processes<br>Intermittent Pneumatic Compression Devices, Compression Bandages<br>Anticoagulant agent (Antithrombins, Heparin, Low-Molecular-Weighted heparin, Factor Xa Inhibitors, new or novel or direct oral anticoagulant, Platelet Aggregation, vitamin K antagonist, fondaparinux, UFH)<br>Thrombolytic Therapy<br>Ultrasonography<br>D-dimer<br>Computed Tomography<br>Ventilation-Perfusion<br>Patient Education<br>Health Services (Management Service, Patient Care Management Managed Care Programs, Ambulatory Care Facilities, Practice Patterns Physicians, Pharmaceutical Services)<br>Point-of-Care Systems<br>Self-Care<br>Self-administration<br>Drug Monitoring<br>Vena cava filter | Any others not included across the ten guidelines                                                                                                                                                                                                                                                                                                                                                        |
| <b>Outcomes:</b>                | Mortality,<br>DVT (any population, location, severity, including recurrence)<br>PE (any population, location, severity, including recurrence)<br>Bleeding (any population, location, severity, including recurrence)<br>Cerebral haemorrhage (bleed)/hemorrhagic stroke<br>Cerebral vein thrombosis<br>Chronic thrombotic pulmonary hypertension<br>Mesenteric vein thrombosis<br>Portal vein thrombosis<br>Post-thrombotic syndrome<br>Retinal vein thrombosis<br>Pregnancy loss<br>Allergic reactions contrast dye<br>Days of work lost<br>HIT<br>Hospitalization (including ER visits)<br>Quality of Life                                                                                                      |                                                                                                                                                                                                                                                                                                                                                                                                          |

Figure 1S. Screening algorithm

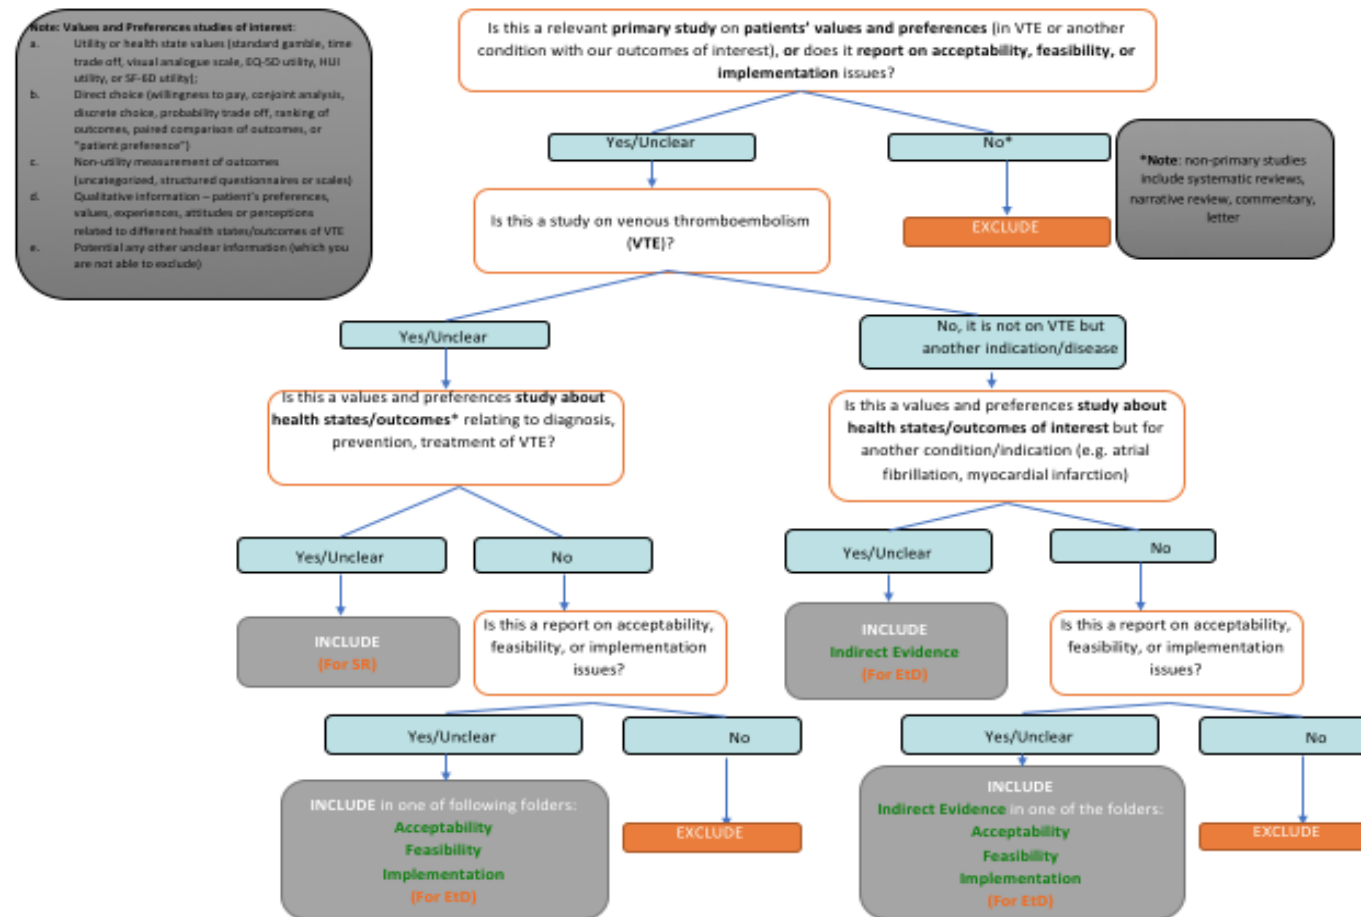

Table 2S. FT studies EXCLUDED with reasons:

| N# | First Author       | Publication Year | Final reason                                                                                         |
|----|--------------------|------------------|------------------------------------------------------------------------------------------------------|
| 1  | Abdel-Aziz, H.     | 2015             | No study type of interest (review, conference abstract or duplicates publications of the same study) |
| 2  | Abdou, J. K.       | 2016             | duplicate                                                                                            |
| 3  | Agarwal, A.        | 2010             | No VP                                                                                                |
| 4  | Ageno (named Riva) | 2012             | No VP                                                                                                |
| 5  | Agharezaei, Z.     | 2014             | No VP                                                                                                |
| 6  | Ahn, J. S.         | 2014             | No VP                                                                                                |
| 7  | Al-Dorzi, H. M.    | 2011             | No VP                                                                                                |
| 8  | Alahmari, A.       | 2015             | No VP                                                                                                |
| 9  | Alegret, J. M.     | 2014             | No VTE (no patient or no intervention of interest)                                                   |
| 10 | Alexander, M.      | 2014             | No VP                                                                                                |
| 11 | AlGhantani, F. H.  | 2009             | No VP                                                                                                |
| 12 | Alolabi, N.        | 2015             | No VTE (no patient or no intervention of interest)                                                   |
| 13 | Alphonsa, A.       | 2015             | No VTE (no patient or no intervention of interest)                                                   |
| 14 | Alzoubi, K. H.     | 2013             | No VP                                                                                                |
| 15 | Amin, A.           | 2016             | No study type of interest (review, conference abstract or duplicates publications of the same study) |
| 16 | Anand, S.          | 2007             | No VTE (no patient or no intervention of interest)                                                   |
| 17 | Arepally, G.       | 2010             | No VP                                                                                                |
| 18 | Arpaia, G.         | 2009             | No VP                                                                                                |
| 19 | Ashrani, A. A.     | 2010             | No VP                                                                                                |
| 20 | Auyeung, V.        | 2016             | No VP                                                                                                |
| 21 | Azboy, I.          | 2016             | No VP                                                                                                |
| 22 | Bahri, O.          | 2015             | No VTE (no patient or no intervention of interest)                                                   |
| 23 | Baker, J. W.       | 2011             | No VP                                                                                                |
| 24 | Bamber, L.         | 2015             | No VP                                                                                                |
| 25 | Barcellona, D.     | 2015             | No VTE (no patient or no intervention of interest)                                                   |
| 26 | Barnes, G. D.      | 2016             | No study type of interest (review, conference abstract or duplicates publications of the same study) |
| 27 | Basey, A. J.       | 2012             | No VP                                                                                                |
| 28 | Baumann, S.        | 2015             | No study type of interest (review, conference abstract or duplicates publications of the same study) |

| <b>N#</b> | <b>First Author</b>   | <b>Publication Year</b> | <b>Final reason</b>                                                                                  |
|-----------|-----------------------|-------------------------|------------------------------------------------------------------------------------------------------|
| 29        | Bavozet, F.           | 2014                    | No VP                                                                                                |
| 30        | Bekker, M. W.         | 2015                    | No VP                                                                                                |
| 31        | Bhalla, R.            | 2013                    | No VP                                                                                                |
| 32        | Bikdeli, B.           | 2011                    | No VP                                                                                                |
| 33        | Biss, T. T.           | 2016                    | No VP                                                                                                |
| 34        | Blattler, W.          | 2005                    | No VP                                                                                                |
| 35        | Blondon               | 2010                    | No VP                                                                                                |
| 36        | Bonderup, M. A.       | 2011                    | No VTE (no patient or no intervention of interest)                                                   |
| 37        | Boom, M. S.           | 2015                    | No VTE (no patient or no intervention of interest)                                                   |
| 38        | Boriani, G.           | 2015                    | No study type of interest (review, conference abstract or duplicates publications of the same study) |
| 39        | Bouabellou, F.        | 2014                    | No VP                                                                                                |
| 40        | Bounameaux, H.        | 2011                    | No study type of interest (review, conference abstract or duplicates publications of the same study) |
| 41        | Brown                 | 2011                    | No VTE (no patient or no intervention of interest)                                                   |
| 42        | Brown (named Siu)     | 2012                    | No study type of interest (review, conference abstract or duplicates publications of the same study) |
| 43        | Bruce, A. K.          | 2013                    | No study type of interest (review, conference abstract or duplicates publications of the same study) |
| 44        | Brunner, H. I.        | 2002                    | No VP                                                                                                |
| 45        | Bryson, D. J.         | 2012                    | No VP                                                                                                |
| 46        | Bullock-Palmer, R. P. | 2008                    | No VP                                                                                                |
| 47        | Cajfinger, F.         | 2016                    | No VP                                                                                                |
| 48        | Can, M. M.            | 2012                    | No VTE (no patient or no intervention of interest)                                                   |
| 49        | Caprini, J. A.        | 2005                    | No VP                                                                                                |
| 50        | Carles, M.            | 2015                    | No VP                                                                                                |
| 51        | Carpenedo, M.         | 2014                    | No VTE (no patient or no intervention of interest)                                                   |
| 52        | Casais                | 2005                    | No VP                                                                                                |
| 53        | Catarinella, F.       | 2014                    | No VP                                                                                                |
| 54        | Catarinella, F. S.    | 2015                    | No VP                                                                                                |
| 55        | Chapman, N. H.        | 2011                    | No VP                                                                                                |

| <b>N#</b> | <b>First Author</b> | <b>Publication Year</b> | <b>Final reason</b>                                                                                  |
|-----------|---------------------|-------------------------|------------------------------------------------------------------------------------------------------|
| 56        | Chen                | 2016                    | No study type of interest (review, conference abstract or duplicates publications of the same study) |
| 57        | Chiong, W.          | 2014                    | No VTE (no patient or no intervention of interest)                                                   |
| 58        | Chiong, W.          | 2014                    | No VTE (no patient or no intervention of interest)                                                   |
| 59        | Choi, J. C.         | 2014                    | No VTE (no patient or no intervention of interest)                                                   |
| 60        | Christensen, T. D.  | 2016                    | No study type of interest (review, conference abstract or duplicates publications of the same study) |
| 61        | Cimminiello, C.     | 2012                    | No VP                                                                                                |
| 62        | Cindolo, L.         | 2009                    | No VP                                                                                                |
| 63        | Clarksmith, D. E.   | 2013                    | No VTE (no patient or no intervention of interest)                                                   |
| 64        | Clay, E.            | 2016                    | No study type of interest (review, conference abstract or duplicates publications of the same study) |
| 65        | Connell, N. T.      | 2015                    | No VP                                                                                                |
| 66        | Connell, N. T.      | 2015                    | No VP                                                                                                |
| 67        | Cook, D.            | 2013                    | No VP                                                                                                |
| 68        | Cook, D.            | 2014                    | No VP                                                                                                |
| 69        | Cook, D.            | 2001                    | No VP                                                                                                |
| 70        | Cowper, P. A.       | 2015                    | No VTE (no patient or no intervention of interest)                                                   |
| 71        | Cox                 | 2003                    | No VP                                                                                                |
| 72        | Croxford, A.        | 2015                    | No VP                                                                                                |
| 73        | D'Souza, R.         | 2016                    | No study type of interest (review, conference abstract or duplicates publications of the same study) |
| 74        | Dalla Libera, M.    | 2016                    | No VP                                                                                                |
| 75        | Day, M. S.          | 2014                    | No VP                                                                                                |
| 76        | Day, R. W.          | 2015                    | No VTE (no patient or no intervention of interest)                                                   |
| 77        | De Caterina, R.     | 2014                    | No VTE (no patient or no intervention of interest)                                                   |
| 78        | De Perrot, M.       | 2014                    | No study type of interest (review, conference abstract or duplicates publications of the same study) |
| 79        | DeBreucker          | 2010                    | No VTE (no patient or no intervention of interest)                                                   |
| 80        | Deitcher, S. R.     | 2004                    | No VP                                                                                                |

| <b>N#</b> | <b>First Author</b> | <b>Publication Year</b> | <b>Final reason</b>                                                                                  |
|-----------|---------------------|-------------------------|------------------------------------------------------------------------------------------------------|
| 81        | DeKoven             | 2012                    | No VTE (no patient or no intervention of interest)                                                   |
| 82        | Dennis              | 2013                    | No VTE (no patient or no intervention of interest)                                                   |
| 83        | Dentali, F.         | 2014                    | No VP                                                                                                |
| 84        | DeSilva             | 2013                    | No VTE (no patient or no intervention of interest)                                                   |
| 85        | Dharmarajan, T. S.  | 2006                    | No VP                                                                                                |
| 86        | Dharmarajan, T. S.  | 2012                    | No VP                                                                                                |
| 87        | Diker, E.           | 2015                    | No VTE (no patient or no intervention of interest)                                                   |
| 88        | Donnelly, J. C.     | 2014                    | No VP                                                                                                |
| 89        | Douketis, J. D.     | 1999                    | No VP                                                                                                |
| 90        | Dracup              | 2003                    | No VTE (no patient or no intervention of interest)                                                   |
| 91        | Dranitsaris, G.     | 2016                    | duplicate                                                                                            |
| 92        | Duff, J.            | 2013                    | No VP                                                                                                |
| 93        | Duff, J.            | 2013                    | No VP                                                                                                |
| 94        | Eckman, M. H.       | 2016                    | No study type of interest (review, conference abstract or duplicates publications of the same study) |
| 95        | Egarter, C.         | 1997                    | No VP                                                                                                |
| 96        | Eijgenraam, P.      | 2015                    | No VP                                                                                                |
| 97        | Elbur, A. I.        | 2015                    | No VP                                                                                                |
| 98        | Enden               | 2013                    | duplicate                                                                                            |
| 99        | Essers, B. A. B.    | 2010                    | No study type of interest (review, conference abstract or duplicates publications of the same study) |
| 100       | Fang                | 2006                    | No VP                                                                                                |
| 101       | Farge-Bancel, D.    | 2014                    | No study type of interest (review, conference abstract or duplicates publications of the same study) |
| 102       | Farge, D.           | 2014                    | No VP                                                                                                |
| 103       | Feder, S. L.        | 2014                    | No VTE (no patient or no intervention of interest)                                                   |
| 104       | Frias Iniesta, J.   | 1996                    | No VP                                                                                                |
| 105       | Fu, A. Z.           | 2016                    | No VTE (no patient or no intervention of interest)                                                   |
| 106       | Fuchs, P.           | 2015                    | No VTE (no patient or no intervention of interest)                                                   |
| 107       | Fuenzalida, C.      | 2015                    | No VP                                                                                                |
| 108       | Gadisseur, A. P. A. | 2004                    | No VP                                                                                                |

| <b>N#</b> | <b>First Author</b> | <b>Publication Year</b> | <b>Final reason</b>                                                                                  |
|-----------|---------------------|-------------------------|------------------------------------------------------------------------------------------------------|
| 109       | Gage, B. F.         | 1998                    | No VTE (no patient or no intervention of interest)                                                   |
| 110       | Galbraith, E. M.    | 2010                    | No VP                                                                                                |
| 111       | Gao, F.             | 2010                    | No VP                                                                                                |
| 112       | Garcia, A. C. F.    | 2005                    | No VP                                                                                                |
| 113       | Gartner, V.         | 2012                    | No VP                                                                                                |
| 114       | Geyer, B. C.        | 2014                    | duplicate                                                                                            |
| 115       | Gibson, N. S.       | 2009                    | No VP                                                                                                |
| 116       | Glauser, T. A.      | 2016                    | No VP                                                                                                |
| 117       | Gnanalingham, K. K. | 2003                    | No VP                                                                                                |
| 118       | González            | 2014                    | No VTE (no patient or no intervention of interest)                                                   |
| 119       | Gonzalez-Rojas, N.  | 2012                    | No VTE (no patient or no intervention of interest)                                                   |
| 120       | Green, A. R.        | 2007                    | No VTE (no patient or no intervention of interest)                                                   |
| 121       | Grier               | 2014                    | No study type of interest (review, conference abstract or duplicates publications of the same study) |
| 122       | Gross               | 2003                    | No VTE (no patient or no intervention of interest)                                                   |
| 123       | Grunau, B. E.       | 2011                    | No VTE (no patient or no intervention of interest)                                                   |
| 124       | Guimicheva, B.      | 2015                    | No VP                                                                                                |
| 125       | Guryel, E.          | 2012                    | No VP                                                                                                |
| 126       | Hanson, S. J.       | 2016                    | No study type of interest (review, conference abstract or duplicates publications of the same study) |
| 127       | Hardy, E.           | 2014                    | No study type of interest (review, conference abstract or duplicates publications of the same study) |
| 128       | Harvey, Carol V.    | 2011                    | No study type of interest (review, conference abstract or duplicates publications of the same study) |
| 129       | Hauber              | 2010                    | No VTE (no patient or no intervention of interest)                                                   |
| 130       | Hawryluk, G. W. J.  | 2011                    | No VP                                                                                                |
| 131       | Haymes              | 2016                    | No VP                                                                                                |
| 132       | Hedner, E.          | 2004                    | No VP                                                                                                |
| 133       | Hendriks, J. M.     | 2015                    | No VTE (no patient or no intervention of interest)                                                   |

| <b>N#</b> | <b>First Author</b> | <b>Publication Year</b> | <b>Final reason</b>                                                                                  |
|-----------|---------------------|-------------------------|------------------------------------------------------------------------------------------------------|
| 134       | Hillis, C.          | 2015                    | No study type of interest (review, conference abstract or duplicates publications of the same study) |
| 135       | Hindorff, L. A.     | 2009                    | No VTE (no patient or no intervention of interest)                                                   |
| 136       | Hinz, P.            | 2003                    | No VP                                                                                                |
| 137       | Hirschfeld, J.      | 2014                    | No VP                                                                                                |
| 138       | Hodgson             | 1998                    | No VTE (no patient or no intervention of interest)                                                   |
| 139       | Hogg                | 2013                    | duplicate                                                                                            |
| 140       | Hohmann, C.         | 2012                    | No VP                                                                                                |
| 141       | Holley              | 2006                    | No VP                                                                                                |
| 142       | Howitt              | 1999                    | No VTE (no patient or no intervention of interest)                                                   |
| 143       | Huber, T.           | 2016                    | No VP                                                                                                |
| 144       | Hull                | 2008                    | No study type of interest (review, conference abstract or duplicates publications of the same study) |
| 145       | Hull, R. D.         | 2009                    | No VP                                                                                                |
| 146       | Hur, H. C.          | 2015                    | No VTE (no patient or no intervention of interest)                                                   |
| 147       | Hyers, T. M.        | 2007                    | No VP                                                                                                |
| 148       | Iannuzzi            | 2014                    | No VP                                                                                                |
| 149       | Imani, B.           | 2014                    | No VP                                                                                                |
| 150       | Insam, C.           | 2016                    | No VP                                                                                                |
| 151       | Isma'eel, H.        | 2006                    | No VP                                                                                                |
| 152       | Ivarsson, B.        | 2014                    | No VP                                                                                                |
| 153       | Jafri, S. D.        | 2015                    | No VTE (no patient or no intervention of interest)                                                   |
| 154       | Johnson, M. J.      | 2012                    | No VP                                                                                                |
| 155       | Jolobe              | 2016                    | No study type of interest (review, conference abstract or duplicates publications of the same study) |
| 156       | Jones, J. M.        | 2010                    | No VTE (no patient or no intervention of interest)                                                   |
| 157       | Jordan, L. A.       | 2014                    | No VTE (no patient or no intervention of interest)                                                   |
| 158       | Jowett, S.          | 2011                    | No VTE (no patient or no intervention of interest)                                                   |
| 159       | Jurcut, R.          | 2015                    | No VTE (no patient or no intervention of interest)                                                   |
| 160       | Kahn, S. R.         | 2002                    | No VP                                                                                                |
| 161       | Kaiser, K.          | 2014                    | No VTE (no patient or no intervention of interest)                                                   |



| <b>N#</b> | <b>First Author</b>  | <b>Publication Year</b> | <b>Final reason</b>                                                                                  |
|-----------|----------------------|-------------------------|------------------------------------------------------------------------------------------------------|
| 162       | Kakkar, N.           | 2004                    | No VP                                                                                                |
| 163       | Kaur, R.             | 2012                    | No study type of interest (review, conference abstract or duplicates publications of the same study) |
| 164       | Kayssi, A.           | 2015                    | No VP                                                                                                |
| 165       | Kayssi, A.           | 2012                    | No VP                                                                                                |
| 166       | Kearon, C.           | 2014                    | No study type of interest (review, conference abstract or duplicates publications of the same study) |
| 167       | Kesieme, E. B.       | 2016                    | No VP                                                                                                |
| 168       | Khan, S.             | 2016                    | No VP                                                                                                |
| 169       | Khorana              | 2009                    | No study type of interest (review, conference abstract or duplicates publications of the same study) |
| 170       | Khudair              | 2010                    | No VP                                                                                                |
| 171       | Kleinjan, A.         | 2012                    | No VP                                                                                                |
| 172       | Kleinjan, A.         | 2014                    | No VP                                                                                                |
| 173       | Klok                 | 2010                    | No VP                                                                                                |
| 174       | Knapp                | 2010                    | No VTE (no patient or no intervention of interest)                                                   |
| 175       | Kneeland, P. P.      | 2010                    | No study type of interest (review, conference abstract or duplicates publications of the same study) |
| 176       | Kodatsky             | 2014                    | No study type of interest (review, conference abstract or duplicates publications of the same study) |
| 177       | Kooistra, H. A.      | 2015                    | No VTE (no patient or no intervention of interest)                                                   |
| 178       | Koops                | 2002                    | No study type of interest (review, conference abstract or duplicates publications of the same study) |
| 179       | Korte                | 2008                    | No study type of interest (review, conference abstract or duplicates publications of the same study) |
| 180       | Kotirum, S.          | 2016                    | No study type of interest (review, conference abstract or duplicates publications of the same study) |
| 181       | Krieger, C.          | 2015                    | No VP                                                                                                |
| 182       | Krishnan, S.         | 2013                    | No VP                                                                                                |
| 183       | Kristiansen, A.      | 2014                    | No VP                                                                                                |
| 184       | Kristoffersen, A. H. | 2006                    | No VTE (no patient or no intervention of interest)                                                   |

| <b>N#</b> | <b>First Author</b>     | <b>Publication Year</b> | <b>Final reason</b>                                                                                  |
|-----------|-------------------------|-------------------------|------------------------------------------------------------------------------------------------------|
| 185       | Kristoffersen, A. H.    | 2016                    | No VP                                                                                                |
| 186       | Kucher, N.              | 2009                    | No VP                                                                                                |
| 187       | Kukhareva, P. V.        | 2014                    | No VTE (no patient or no intervention of interest)                                                   |
| 188       | Kumar, R.               | 2014                    | No VP                                                                                                |
| 189       | Lane, D. A.             | 2006                    | No VTE (no patient or no intervention of interest)                                                   |
| 190       | Langland-Orban, B.      | 1993                    | No VP                                                                                                |
| 191       | Larsen, T. B.           | 2015                    | No VTE (no patient or no intervention of interest)                                                   |
| 192       | Lau, B. D.              | 2015                    | No VP                                                                                                |
| 193       | Lau, C.                 | 2015                    | No VP                                                                                                |
| 194       | Lee, J. A.              | 2014                    | No VP                                                                                                |
| 195       | Lee, J. A.              | 2014                    | No VP                                                                                                |
| 196       | Lee, S.                 | 2012                    | No VTE (no patient or no intervention of interest)                                                   |
| 197       | Lip                     | 1996                    | No VTE (no patient or no intervention of interest)                                                   |
| 198       | Lip, G. Y.              | 2002                    | No VTE (no patient or no intervention of interest)                                                   |
| 199       | Lip, G. Y.              | 2011                    | No study type of interest (review, conference abstract or duplicates publications of the same study) |
| 200       | Lloyd, N. S.            | 2012                    | No VP                                                                                                |
| 201       | Lozada, Y.              | 2012                    | No VTE (no patient or no intervention of interest)                                                   |
| 202       | Lozano Sanchez, F. S.   | 2013                    | No VP                                                                                                |
| 203       | Lubenow                 | 2007                    | No VP                                                                                                |
| 204       | Lustig, D. B.           | 2015                    | No VP                                                                                                |
| 205       | Lynd, L. D.             | 2004                    | No study type of interest (review, conference abstract or duplicates publications of the same study) |
| 206       | Machado, R. B.          | 2015                    | No VP                                                                                                |
| 207       | MacLean                 | 2012                    | No study type of interest (review, conference abstract or duplicates publications of the same study) |
| 208       | MacLean                 | 2010                    | No study type of interest (review, conference abstract or duplicates publications of the same study) |
| 209       | Macquart de Terline, D. | 2016                    | No VTE (no patient or no intervention of interest)                                                   |
| 210       | Maeda, K.               | 2012                    | No VTE (no patient or no intervention of interest)                                                   |

| <b>N#</b> | <b>First Author</b> | <b>Publication Year</b> | <b>Final reason</b>                                                                                  |
|-----------|---------------------|-------------------------|------------------------------------------------------------------------------------------------------|
| 211       | Mahan, C. E.        | 2010                    | No study type of interest (review, conference abstract or duplicates publications of the same study) |
| 212       | Majluf-Cruz, A.     | 2013                    | No VP                                                                                                |
| 213       | Man-Son-Hing        | 1999                    | No VTE (no patient or no intervention of interest)                                                   |
| 214       | Marini, B. L.       | 2014                    | No VP                                                                                                |
| 215       | Martens, Tanya Z.   | 2007                    | No VP                                                                                                |
| 216       | Matzdorff, A.       | 2015                    | No VP                                                                                                |
| 217       | May                 | 2006                    | No VP                                                                                                |
| 218       | McAlister, F. A.    | 2004                    | No VTE (no patient or no intervention of interest)                                                   |
| 219       | McFarland, L.       | 2014                    | No VP                                                                                                |
| 220       | McFarland, L.       | 2013                    | No VP                                                                                                |
| 221       | McGowan, K. E.      | 2016                    | No VP                                                                                                |
| 222       | Mean, M.            | 2014                    | No VP                                                                                                |
| 223       | Mellon, L.          | 2015                    | No VTE (no patient or no intervention of interest)                                                   |
| 224       | Mendoza, E.         | 2012                    | No VP                                                                                                |
| 225       | Mengiardi, S.       | 2011                    | No VTE (no patient or no intervention of interest)                                                   |
| 226       | Mennuni, M.         | 2014                    | No VTE (no patient or no intervention of interest)                                                   |
| 227       | Merwin, S. L.       | 2013                    | No VP                                                                                                |
| 228       | Meyding-Lamade, U.  | 2014                    | No VTE (no patient or no intervention of interest)                                                   |
| 229       | Meyer, G.           | 2004                    | No study type of interest (review, conference abstract or duplicates publications of the same study) |
| 230       | Meyer, G.           | 2004                    | No VP                                                                                                |
| 231       | Michtalik, H. J.    | 2013                    | No VP                                                                                                |
| 232       | Middlekauff         | 1995                    | No VP                                                                                                |
| 233       | Miller, P. S. J.    | 2005                    | No study type of interest (review, conference abstract or duplicates publications of the same study) |
| 234       | Mirkazemi, C.       | 2012                    | No VP                                                                                                |
| 235       | Mockler             | 2012                    | No VP                                                                                                |
| 236       | Mohamed, A. F.      | 2010                    | No VTE (no patient or no intervention of interest)                                                   |
| 237       | Moloczij, N.        | 2015                    | No VTE (no patient or no intervention of interest)                                                   |
| 238       | Mondry, A.          | 2015                    | No VTE (no patient or no intervention of interest)                                                   |

| <b>N#</b> | <b>First Author</b> | <b>Publication Year</b> | <b>Final reason</b>                                                                                  |
|-----------|---------------------|-------------------------|------------------------------------------------------------------------------------------------------|
| 239       | Monnazzi, M. S.     | 2012                    | No VP                                                                                                |
| 240       | Moretto, P.         | 2014                    | No VP                                                                                                |
| 241       | Morgan, S. J.       | 2001                    | No VP                                                                                                |
| 242       | Mufti, H. N.        | 2015                    | No VP                                                                                                |
| 243       | Murthy, C.          | 2016                    | No VP                                                                                                |
| 244       | Myles, P. S.        | 2014                    | No VTE (no patient or no intervention of interest)                                                   |
| 245       | Nascimento, T.      | 2014                    | No VP                                                                                                |
| 246       | Naylor, C. D.       | 1990                    | No VTE (no patient or no intervention of interest)                                                   |
| 247       | Nazarenko, G. I.    | 2015                    | No VP                                                                                                |
| 248       | Noble, S.           | 2015                    | duplicate                                                                                            |
| 249       | Noble, S. I.        | 2006                    | No VP                                                                                                |
| 250       | Noble, S. I.        | 2005                    | duplicate                                                                                            |
| 251       | Noble, S. I. R.     | 2006                    | No VP                                                                                                |
| 252       | Nwulu, U.           | 2014                    | No VP                                                                                                |
| 253       | O'Brien, E. C.      | 2014b                   | No VTE (no patient or no intervention of interest)                                                   |
| 254       | O'Brien, E. C.      | 2014a                   | No VTE (no patient or no intervention of interest)                                                   |
| 255       | O'Connor, E.        | 2015                    | No VP                                                                                                |
| 256       | Oh                  | 2014                    | No study type of interest (review, conference abstract or duplicates publications of the same study) |
| 257       | Okumura, K.         | 2015                    | No VTE (no patient or no intervention of interest)                                                   |
| 258       | Oterhals, K.        | 2014                    | No VP                                                                                                |
| 259       | Othieno, R.         | 2007                    | No study type of interest (review, conference abstract or duplicates publications of the same study) |
| 260       | Page, E. E.         | 2016                    | No study type of interest (review, conference abstract or duplicates publications of the same study) |
| 261       | Pagella, P.         | 2007                    | No VP                                                                                                |
| 262       | Pai, M.             | 2013                    | No VP                                                                                                |
| 263       | Paiva, E. F.        | 2009                    | No study type of interest (review, conference abstract or duplicates publications of the same study) |
| 264       | Palomaki, A.        | 2016                    | No VTE (no patient or no intervention of interest)                                                   |
| 265       | Parikh, K. C.       | 2012                    | No VP                                                                                                |

| <b>N#</b> | <b>First Author</b> | <b>Publication Year</b> | <b>Final reason</b>                                                                                  |
|-----------|---------------------|-------------------------|------------------------------------------------------------------------------------------------------|
| 266       | Parkash             | 2013                    | No study type of interest (review, conference abstract or duplicates publications of the same study) |
| 267       | Pascoe, H.          | 2014                    | No VTE (no patient or no intervention of interest)                                                   |
| 268       | Pessinaba, S.       | 2014                    | No VP                                                                                                |
| 269       | Piazza, G.          | 2012                    | No VP                                                                                                |
| 270       | Pillai, A.          | 2004                    | No VP                                                                                                |
| 271       | Pineo               | 2012                    | No study type of interest (review, conference abstract or duplicates publications of the same study) |
| 272       | Polk, H. C., Jr.    | 2008                    | No VP                                                                                                |
| 273       | Popoola, V. O.      | 2016                    | No study type of interest (review, conference abstract or duplicates publications of the same study) |
| 274       | Porfidia, A.        | 2014                    | No study type of interest (review, conference abstract or duplicates publications of the same study) |
| 275       | Pouw                | 1995                    | No VP                                                                                                |
| 276       | Power               | 2013                    | No VTE (no patient or no intervention of interest)                                                   |
| 277       | Prins               | 2009                    | No VTE (no patient or no intervention of interest)                                                   |
| 278       | Prins, M.           | 2012                    | No VP                                                                                                |
| 279       | Protheroe, J.       | 2001                    | No VTE (no patient or no intervention of interest)                                                   |
| 280       | Protheroe, J.       | 2000                    | No VTE (no patient or no intervention of interest)                                                   |
| 281       | Provias, T.         | 2014                    | No VP                                                                                                |
| 282       | Rajasekhar, A.      | 2012                    | No VP                                                                                                |
| 283       | Rey, J. B.          | 2016                    | No VP                                                                                                |
| 284       | Rezaie, S. R.       | 2015                    | No VP                                                                                                |
| 285       | Rizzo-Padoin, N.    | 2001                    | No VP                                                                                                |
| 286       | Rodger              | 2014                    | No study type of interest (review, conference abstract or duplicates publications of the same study) |
| 287       | Rodger              | 2003                    | No VP                                                                                                |
| 288       | Rodgers, A.         | 1994                    | No VP                                                                                                |
| 289       | Roque, D. R.        | 2016                    | No study type of interest (review, conference abstract or duplicates publications of the same study) |

| <b>N#</b> | <b>First Author</b> | <b>Publication Year</b> | <b>Final reason</b>                                                                                  |
|-----------|---------------------|-------------------------|------------------------------------------------------------------------------------------------------|
| 290       | Rossle, M.          | 2014                    | No study type of interest (review, conference abstract or duplicates publications of the same study) |
| 291       | Ruiz-Artacho, P.    | 2015                    | No study type of interest (review, conference abstract or duplicates publications of the same study) |
| 292       | Sacchi, L.          | 2015                    | No VP                                                                                                |
| 293       | Salinas, J.         | 2016                    | No VTE (no patient or no intervention of interest)                                                   |
| 294       | Samuelson, B. T.    | 2015                    | No VP                                                                                                |
| 295       | Scales, D. C.       | 2010                    | No VP                                                                                                |
| 296       | Schellong, S. M.    | 2015                    | No VP                                                                                                |
| 297       | Schousboe           | 2013                    | No VP                                                                                                |
| 298       | Schouten, H. J.     | 2014                    | No VP                                                                                                |
| 299       | Schwarz, T.         | 2001                    | No VP                                                                                                |
| 300       | Shaha, M.           | 2015                    | No VP                                                                                                |
| 301       | Sharma, V.          | 2010                    | No VP                                                                                                |
| 302       | Sheard, L.          | 2012                    | No VP                                                                                                |
| 303       | Shuaib, W.          | 2014                    | No VTE (no patient or no intervention of interest)                                                   |
| 304       | Smart, P.           | 2013                    | No VP                                                                                                |
| 305       | Smith, M. B.        | 2010                    | No VTE (no patient or no intervention of interest)                                                   |
| 306       | Soukoulis, V.       | 2015                    | No VP                                                                                                |
| 307       | Spitzer, K. A.      | 2006                    | No VP                                                                                                |
| 308       | Spokoyny, I.        | 2016                    | No study type of interest (review, conference abstract or duplicates publications of the same study) |
| 309       | Stecksen, A.        | 2014                    | No VTE (no patient or no intervention of interest)                                                   |
| 310       | Steib, A.           | 2014                    | No VP                                                                                                |
| 311       | Steiner             | 2013                    | No VP                                                                                                |
| 312       | Sterpu, R.          | 2015                    | No VP                                                                                                |
| 313       | Stolz               | 2015                    | No VP                                                                                                |
| 314       | Streiff, M. B.      | 2012                    | No VP                                                                                                |
| 315       | Sudlow              | 1998                    | No VTE (no patient or no intervention of interest)                                                   |
| 316       | Sullivan, P. W.     | 2006                    | No VTE (no patient or no intervention of interest)                                                   |
| 317       | Tanaka-Esposito, C. | 2015                    | No study type of interest (review, conference abstract or duplicates publications of the same study) |

| <b>N#</b> | <b>First Author</b>   | <b>Publication Year</b> | <b>Final reason</b>                                                                                  |
|-----------|-----------------------|-------------------------|------------------------------------------------------------------------------------------------------|
| 318       | Tang, X.              | 2015                    | No VP                                                                                                |
| 319       | Tanweer, O.           | 2014                    | No VTE (no patient or no intervention of interest)                                                   |
| 320       | Tardy                 | 2003                    | No VP                                                                                                |
| 321       | Tavoly, M.            | 2015                    | No VP                                                                                                |
| 322       | Taylor                | 1994                    | No VP                                                                                                |
| 323       | Thach, A. V.          | 2016                    | No VTE (no patient or no intervention of interest)                                                   |
| 324       | Tietze, M.            | 2014                    | No study type of interest (review, conference abstract or duplicates publications of the same study) |
| 325       | Toyoda, K.            | 2015                    | No VTE (no patient or no intervention of interest)                                                   |
| 326       | Tulstrup, M.          | 2016                    | No VTE (no patient or no intervention of interest)                                                   |
| 327       | Umscheid, C. A.       | 2012                    | No VP                                                                                                |
| 328       | van Zyl, M.           | 2014                    | No VP                                                                                                |
| 329       | Vardi, M.             | 2012                    | No VP                                                                                                |
| 330       | Vasishta, S.          | 2001                    | No VTE (no patient or no intervention of interest)                                                   |
| 331       | Verhoef, T. I.        | 2015                    | No VTE (no patient or no intervention of interest)                                                   |
| 332       | Verhoef, T. I.        | 2014                    | No VP                                                                                                |
| 333       | Viale, P. H.          | 2004                    | No study type of interest (review, conference abstract or duplicates publications of the same study) |
| 334       | Vogt                  | 2011                    | No VTE (no patient or no intervention of interest)                                                   |
| 335       | Volterrani            | 2013                    | No VTE (no patient or no intervention of interest)                                                   |
| 336       | Wade                  | 2017                    | No study type of interest (review, conference abstract or duplicates publications of the same study) |
| 337       | Wang, Y.              | 2013                    | No VTE (no patient or no intervention of interest)                                                   |
| 338       | Warcel, D.            | 2014                    | No VTE (no patient or no intervention of interest)                                                   |
| 339       | Warle'-Van Herwaarden | 2014                    | No VP                                                                                                |
| 340       | Welin                 | 2014                    | No VTE (no patient or no intervention of interest)                                                   |
| 341       | Wells                 | 2009                    | No VTE (no patient or no intervention of interest)                                                   |
| 342       | Wells, P. S.          | 1998                    | No VP                                                                                                |

| <b>N#</b> | <b>First Author</b> | <b>Publication Year</b> | <b>Final reason</b>                                                                                  |
|-----------|---------------------|-------------------------|------------------------------------------------------------------------------------------------------|
| 343       | Wiemer, M.          | 2015                    | No VTE (no patient or no intervention of interest)                                                   |
| 344       | Winans, A. R. M.    | 2010                    | No VP                                                                                                |
| 345       | Wolpin, S.          | 2011                    | No VP                                                                                                |
| 346       | Woods, K.           | 2004                    | No VTE (no patient or no intervention of interest)                                                   |
| 347       | Wu, Y.              | 2004                    | No VTE (no patient or no intervention of interest)                                                   |
| 348       | Wutzler, A.         | 2014                    | No VTE (no patient or no intervention of interest)                                                   |
| 349       | Yamada              | 2015                    | No study type of interest (review, conference abstract or duplicates publications of the same study) |
| 350       | Yates, M.           | 2014                    | No VP                                                                                                |
| 351       | Yee, D. L.          | 2009                    | No VP                                                                                                |
| 352       | Young, A.           | 2016                    | No VP                                                                                                |
| 353       | Yuan                | 2014                    | No VTE (no patient or no intervention of interest)                                                   |
| 354       | Yuan, Z.            | 2014                    | No VTE (no patient or no intervention of interest)                                                   |
| 355       | Zairul-Nizam, Z. F. | 2003                    | No VP                                                                                                |
| 356       | Zeidan, A. M.       | 2012                    | No VP                                                                                                |
| 357       | Zeidan, A. M.       | 2011                    | No VP                                                                                                |
| 358       | Zierler, B. K.      | 2002                    | No VP                                                                                                |
| 359       | Zytaruk, N.         | 2014                    | No VP                                                                                                |
| 360       | Gong                | 2017                    | No VTE (no patient or no intervention of interest)                                                   |
| 361       | Mehta               | 2018                    | No study type of interest (review, conference abstract or duplicates publications of the same study) |
| 362       | Shafrin             | 2016                    | No VTE (no patient or no intervention of interest)                                                   |
| 363       | van Blerk           | 2004                    | No VP                                                                                                |
| 364       | Abdou, J. K.        | 2015                    | conference abstract                                                                                  |
| 365       | Cohen               | 2014                    | conference abstract                                                                                  |
| 366       | Dranitsaris, G.     | 2006                    | No VP                                                                                                |



Table 3S. – Quantitative Studies’ characteristic and Results table

| Study ID    | Study design           | Country | Funding source | Population description                                                                                                                                                                                                                | Sample size | Sampling strategy | Response rate | Age (years)                                | Male/female                                       | Measurement methods                                 | Description of health states                                                                                               | Unit                           | Results                                                                                                                                                                                                                                                                                                                                                                                                                                                                                                                                                                                                                                                                                                                                                               | Overall RoB  |
|-------------|------------------------|---------|----------------|---------------------------------------------------------------------------------------------------------------------------------------------------------------------------------------------------------------------------------------|-------------|-------------------|---------------|--------------------------------------------|---------------------------------------------------|-----------------------------------------------------|----------------------------------------------------------------------------------------------------------------------------|--------------------------------|-----------------------------------------------------------------------------------------------------------------------------------------------------------------------------------------------------------------------------------------------------------------------------------------------------------------------------------------------------------------------------------------------------------------------------------------------------------------------------------------------------------------------------------------------------------------------------------------------------------------------------------------------------------------------------------------------------------------------------------------------------------------------|--------------|
| Anand 2007  | Cross-sectional survey | UK      | NR             | patients undergoing hip and knee joint replacement                                                                                                                                                                                    | 43          | Consecutive       | 100%          | Mean: 69.9, range: 36-85                   | male/female: 14/29 (33%/67%)                      | forced choice: treatment preferences                | printed questionnaire                                                                                                      | Choice or proportion of choice | <p>- direct choice preference - would rather not use the foot pump: 44.18% mechanical vs. 27.9% who would rather not have injections (p = 0.12)</p> <p>-51.2% would be willing to keep on using these foot pumps at home for 4 weeks after discharge from the hospital, + another 18.6% were neutral about it (overall 69.8%).</p> <p>-76.7% would be willing to continue LMWH at home (86% agree or neutral)</p> <p>-44.2% preferred to have the foot pump on only during the daytime.</p> <p>--37.2% preferred to have the foot pumps on only at night.</p> <p>27.9% preferred to have the foot pumps on during both day and night.</p> <p>-72.1% agreed to use foot pumps if they were to have another hip or knee operation while 9.3% were neutral about it.</p> | Moderate RoB |
| Attaya 2012 | Cross-sectional study  | USA     | NR             | patients older than 18 years and had been on warfarin for at least 2 months (for atrial fibrillation, pulmonary embolism, or deep venous thrombosis); Subgroup information for age $\geq 70$ and $<70$ , female and male was reported | 155         | Consecutive       | 86.00%        | Mean (SD): 68 ( $\pm 12.6$ ), range: 29-91 | male/female: 78/71 (50%/44%), no response : 6, 4% | forced choice: willingness to switch anticoagulants | Other: in question , for example "If there is a new drug that can replace warfarin without monitoring, but has to be taken | Choice or proportion of choice | <p>When being asked whether they would like to replace the warfarin with a treatment without monitoring, 58% (90 of 154) of patients willing to switch anticoagulants, and 36% (55 of 154) willing to make a change despite increased cost. Patients older than 70 years were significantly more willing to switch anticoagulants than those younger than 70 years (48 of 68, 71% vs. 38 of 75, 51%). Women were significantly less willing to switch (31 of 71, 44% for women vs. 54 of 78, 69% for men)</p>                                                                                                                                                                                                                                                         | Serious RoB  |

| Study ID        | Study design          | Country                                                                         | Funding source                                           | Population description                                                               | Sample size | Sampling strategy | Response rate      | Age (years)                       | Male/female                      | Measurement methods                                    | Description of health states | Unit                           | Results                                                                                                                                                                                                                                                                                                                                                                                                                                                                                                                                                                                                                                                                                                                               | Overall RoB |
|-----------------|-----------------------|---------------------------------------------------------------------------------|----------------------------------------------------------|--------------------------------------------------------------------------------------|-------------|-------------------|--------------------|-----------------------------------|----------------------------------|--------------------------------------------------------|------------------------------|--------------------------------|---------------------------------------------------------------------------------------------------------------------------------------------------------------------------------------------------------------------------------------------------------------------------------------------------------------------------------------------------------------------------------------------------------------------------------------------------------------------------------------------------------------------------------------------------------------------------------------------------------------------------------------------------------------------------------------------------------------------------------------|-------------|
|                 |                       |                                                                                 |                                                          |                                                                                      |             |                   |                    |                                   |                                  |                                                        | twice a day"                 |                                |                                                                                                                                                                                                                                                                                                                                                                                                                                                                                                                                                                                                                                                                                                                                       |             |
| Baba 2015       | Cross-sectional study | Jordan                                                                          | NR                                                       | cancer patients who underwent a major abdominal/pelvic surgery                       | 125         | NR                | NR                 | <20:0, 20-40:16, 40-60:69, >60:40 | male/female: 59/66 (47% / 53%)   | forced choice: treatment preferences                   | Verbal description           | Choice or proportion of choice | For patients receiving low molecular weight heparin (LMWH) after major abdominal/pelvic surgeries in cancer patients, 33 (26.4%), 50 (40.0%), and 42 (33.6%) prefer the first injection by himself, by nurse and by family/friend, respectively. 46 (36.8%), 42 (33.6%), and 37 (29.6%) prefer the second injection by himself, by nurse and by family/friend, respectively.                                                                                                                                                                                                                                                                                                                                                          | Serious RoB |
| Barcellona 2000 | Cross-sectional study | Italy                                                                           | NR                                                       | patients who were on long-term oral anticoagulation                                  | 264         | Consecutive       | NR                 | Mean (SD): 55(± 19)               | male/female:127 /137 (48% / 52%) | structured questionnaire: concerns about the treatment | no description               | Choice or proportion of choice | 11% of respondents answered the anticoagulant therapy is limiting their everyday life much, while 89% said little or none. When they have had a negative episode, 13% of them are not afraid of negative consequences.                                                                                                                                                                                                                                                                                                                                                                                                                                                                                                                | Serious RoB |
| Bates 2016      | Cross-sectional study | seven centers in six countries (Canada, USA, Brazil, Finland, Norway and Spain) | Private not for profit, Private for profit, Governmental | Pregnant women and women who consider pregnancy, women who are on thromboprophylaxis | 123         | NR                | 65.8% (123 of 187) | Mean (SD): 33.94 (± 6.2)          | pregnant women                   | Direct choice-treatment trade off and VAS              |                              | Choice or proportion of choice | The median threshold reduction in VTE risk at which women were willing to accept use of LMWH, given a fixed 16% risk of VTE without prophylaxis, was 3%. women with less than 2 weeks of previous experience with LMWH during pregnancy, compared to those with 2 weeks or more of previous experience required a greater VTE risk reduction (2.0%; 95% CI: 0.3% to 3.8%); Pregnant women and women planning pregnancy required a greater VTE risk reduction (1.6%; 95% CI: -0.0% to 3.3%), compared to those neither pregnant nor planning a pregnancy, though the results did not reach conventional statistical significance (p = 0.07). The majority of women were willing to use prophylactic LMWH in the real-life scenario (21 | Low RoB     |

| Study ID    | Study design                | Country         | Funding source | Population description                                                                                                                                                                                                                                                                                 | Sample size | Sampling strategy | Response rate | Age (years)          | Male/female                    | Measurement methods                            | Description of health states | Unit                              | Results                                                                                                                                                                                                                                                                                                                                                                                                                                                                                        | Overall RoB |
|-------------|-----------------------------|-----------------|----------------|--------------------------------------------------------------------------------------------------------------------------------------------------------------------------------------------------------------------------------------------------------------------------------------------------------|-------------|-------------------|---------------|----------------------|--------------------------------|------------------------------------------------|------------------------------|-----------------------------------|------------------------------------------------------------------------------------------------------------------------------------------------------------------------------------------------------------------------------------------------------------------------------------------------------------------------------------------------------------------------------------------------------------------------------------------------------------------------------------------------|-------------|
|             |                             |                 |                |                                                                                                                                                                                                                                                                                                        |             |                   |               |                      |                                |                                                |                              |                                   | of 35 or 60.0% of low risk women and 76 of 88 or 86.4% of high-risk women). This proportion was smaller in the women pregnant or planning a pregnancy (26 of 36 or 76.2% at higher risk of recurrence and 11 of 20 or 55.0% of those at lower risk). The preference for prophylaxis was consistent in all three hypothetical (low, medium and high risk of VTE) scenarios (67.0%, 84.0%, 89.7% respectively).                                                                                  |             |
| Bouman 2016 | randomized controlled trial | the Netherlands | Governmental   | patients with DVT                                                                                                                                                                                                                                                                                      | 300         | Random            | not report    | Mean (SD): 59 (± 13) | Male/Female: 184/116 (61%/39%) | discrete choice exercise/conjoint analysis     | no description               | Relative importance of attributes | Significant determinants of preference were: PTS risk reduction, putting on the ECS, duration of ECS therapy, reduction in current complaints, comfort of wearing the ECS and ease of washing the ECS. Cost and appearance of the ECS did not significantly influence preference. Patients were willing to increase the duration of therapy by 1 year for an additional PTS risk reduction of 10%. Patients accepted a 29% increase in risk of PTS if they could put on the ECS independently. | Serious RoB |
| Brady 2007  | Cross-sectional study       | USA             | NR             | A survey design method was used to collect information from patients regarding why these stockings and/or compression devices were being used, whether they found them comfortable enough to wear, and how long they wore them per day. The study also included observations on the fit of TEDS and/or | 124/137     | Random            | 0.905         | Range: 18-92         | male/female: 65/72 (52%/48%)   | forced choice: treatment burden with stockings | Verbal description           | Choice or proportion of choice    | For 91 patients who were not wearing sequential compression devices, 39% of them suggested SCDs were uncomfortable (hot, itchy); while for 51 patients who were not wearing thromboembolic deterrent stockings, 59% of them said these stockings were uncomfortable to wear.                                                                                                                                                                                                                   | Serious RoB |

| Study ID        | Study design          | Country     | Funding source      | Population description                                                                                                                                     | Sample size | Sampling strategy | Response rate   | Age (years)              | Male/female                      | Measurement methods                             | Description of health states                       | Unit                           | Results                                                                                                                                                                                                                                                                                                                                                                                                                                                                                                                                                                                                                                                                                                                                                                                                                                                                                  | Overall RoB |
|-----------------|-----------------------|-------------|---------------------|------------------------------------------------------------------------------------------------------------------------------------------------------------|-------------|-------------------|-----------------|--------------------------|----------------------------------|-------------------------------------------------|----------------------------------------------------|--------------------------------|------------------------------------------------------------------------------------------------------------------------------------------------------------------------------------------------------------------------------------------------------------------------------------------------------------------------------------------------------------------------------------------------------------------------------------------------------------------------------------------------------------------------------------------------------------------------------------------------------------------------------------------------------------------------------------------------------------------------------------------------------------------------------------------------------------------------------------------------------------------------------------------|-------------|
|                 |                       |             |                     | SCDs. Only those patients who had sufficient stamina and concentration to complete the 15-minute survey were asked to participate.                         |             |                   |                 |                          |                                  |                                                 |                                                    |                                |                                                                                                                                                                                                                                                                                                                                                                                                                                                                                                                                                                                                                                                                                                                                                                                                                                                                                          |             |
| Brekelmans 2017 | Cross-sectional study | Netherlands | No external funding | Patients treated with VKA for deep vein thrombosis (DVT) or pulmonary embolism (PE) at the Thrombosis Service of Amsterdam                                 | 135         | Random            | 67.5% (135/200) | Mean (SD): 70 (± 12)     | Male/Female: 61/74 (45%/55%)     | Direct choice-treatment trade off               | Different scenarios described in the questionnaire | Choice or proportion of choice | The response rate was 68%. In scenario 1 (no need for laboratory control), 36% of patients would switch to a DOAC. This proportion rises to 57% (odds ratio [OR] 2.3; 95% confidence interval [CI] 1.6-3.3) for scenario 2 (decreased bleeding risk). Scenario 3 (less interactions with food and other drugs) resulted in 64% of patients preferring a DOAC (OR 3.2; 95%CI 2.2-4.6). The advantage of greater efficacy, scenarios 4, did not result in a noteworthy change in the preference. Almost two-thirds of patients preferred DOACs over VKA. Major reasons for switching to a DOAC were the lack of regular laboratory monitoring, the low risk of bleeding and the absence of interactions with food and other drugs. Patients less satisfied with their current treatment, younger patients and patients with higher education were more likely to prefer a DOAC over a VKA. | Low RoB     |
| Cajfinger 2013  | cohort study          | France      | Private for profit  | Eligible patients were aged ≥18 years, with (1) histologically or cytologically-diagnosed cancer including solid or hematologic cancer and receiving anti- | 409         | Consecutive       | NR              | Mean (SD): 65.0 (± 12.1) | male/female: 205/204 50.1%/49.9% | Structured questionnaire: treatment expectation | no description                                     | Mean (SD)                      | Highest "Treatment Expectations" mean scores at study start were reported on the "importance of ease of use" (4.22 ± 0.9), "expectations of symptom relief" (3.98 ± 1.04), and "confidence in the treatment to prevent blood clots" (3.94 ± 0.75) while 54.3% of patients had low expectations of treatment-related side effects (bruise, bleeding) (2.45 ± 1.1). Lowest scores were reported on "worries                                                                                                                                                                                                                                                                                                                                                                                                                                                                                | Serious RoB |

| Study ID  | Study design | Country | Funding source | Population description                                                                                                                                                                                                                                                                             | Sample size | Sampling strategy | Response rate | Age (years)                            | Male/female | Measurement methods | Description of health states | Unit                 | Results                                                                                                                                                                                                                                                                                                                                                                                                                                                                                 | Overall RoB |
|-----------|--------------|---------|----------------|----------------------------------------------------------------------------------------------------------------------------------------------------------------------------------------------------------------------------------------------------------------------------------------------------|-------------|-------------------|---------------|----------------------------------------|-------------|---------------------|------------------------------|----------------------|-----------------------------------------------------------------------------------------------------------------------------------------------------------------------------------------------------------------------------------------------------------------------------------------------------------------------------------------------------------------------------------------------------------------------------------------------------------------------------------------|-------------|
|           |              |         |                | neoplastic treatment or palliative care; (2) objectively diagnosed recent and symptomatic DVT of upper or lower limbs, PE, visceral thrombosis or CVC-associated thrombosis; (3) LMWH anticoagulant treatment for VTE started within 7 days before inclusion and (4) no contra-indication to LMWH. |             |                   |               |                                        |             |                     |                              |                      | about mistakes" (1.9 ± 1.1) and "worries about cost" (1.9 ± 1.3).                                                                                                                                                                                                                                                                                                                                                                                                                       |             |
| Chan 2007 | cohort study | UK      | NR             | Patients undergoing lower limb arthroplasty                                                                                                                                                                                                                                                        | 30          | NR                | NR            | Mean (SD): 72.4 (± 11.2), Range: 44-91 | NR          | Contingent choice   | Booklet/card                 | proportion of choice | It was detected an overall progressive decline in the level of compliance as post-operative time increased [P < 0.001, Chi-square (2) test]. The average level of patient "comfort" was 7.1 on a visual analogue scale of 0–10. Sleep disturbance was reported by 57% of patients, while 43% complained of "heat intolerance". It was also shown that compliance is significantly reduced in those who complained of "sleep disturbance" while using the foot pumps (t-test, P < 0.05). | Serious RoB |

| Study ID          | Study design          | Country | Funding source     | Population description                                              | Sample size | Sampling strategy                                                                                              | Response rate | Age (years)                                        | Male/female                           | Measurement methods                  | Description of health states                            | Unit                           | Results                                                                                                                                                                                                                                                                                                                                                                                                                                                                                                                                  | Overall RoB |
|-------------------|-----------------------|---------|--------------------|---------------------------------------------------------------------|-------------|----------------------------------------------------------------------------------------------------------------|---------------|----------------------------------------------------|---------------------------------------|--------------------------------------|---------------------------------------------------------|--------------------------------|------------------------------------------------------------------------------------------------------------------------------------------------------------------------------------------------------------------------------------------------------------------------------------------------------------------------------------------------------------------------------------------------------------------------------------------------------------------------------------------------------------------------------------------|-------------|
| Chiou-Tan 2003    | RCT                   | USA     | NR                 | Patients with spinal cord injury                                    | 95          | Consecutive                                                                                                    | 84% (80/95)   | Mean (SD): 36.1 (± 15.0); range, 16–75             | male/female: 75%/25%                  | rating scale (1-10)                  | No described: patient were asked to answer a questioner | Mean (SD) and Range            | After being discharged home, the patients receiving enoxaparin rated the shots significantly more inconvenient (two injections per day) compared with taking three pills per day, than those receiving dalteparin (one injection per day, P 0.05):<br>painfulness (1: not at all - extremely painful): 1.90(1.52) vs 2.05 (1.99), hassle (1: much less-much more): 3.05 (3.24) vs. -1.32(1.16) and Difficulty of giving injections (extremely difficult to extremely easy): 9.25 (1.37) - range 5-10 enoxaparin; 9.63 (0.60) range 8-10. | Serious RoB |
| Drantis aris 2016 | Cross-sectional study | Canada  | Private for profit | People from general public                                          | 24          | 1. A Random sample from the Canadian tax paying public, using a multistage, random cluster sampling technique. | NR            | 52 years (range: 32-73 years)                      | male/female: 11/24 (45.8%) female     | time trade off                       | Verbal description                                      | Mean (95% Confidence interval) | Dalteparin group: 0.66 (0.57,0.74); Oral therapy group: 0.38 (0.30,0.45)                                                                                                                                                                                                                                                                                                                                                                                                                                                                 | Low RoB     |
| Elewa 2014        | Cross-sectional study | USA     | NR                 | warfarin patients followed in the outpatient anticoagulation clinic | 260         | NR                                                                                                             | 260 of 273    | age (%): <30 5.1, 30-49 22.5, 50-70 43.5, >70 24.1 | male/female: 45.1%/50.2%, missing 4.7 | forced choice: treatment preferences | no description                                          | Mean (SD)                      | With a scale of 1-5, one indicating being the least favorable or strongly disagree, and five indicating being most favorable or strongly agree, the willingness to change to a new oral anticoagulant as effective as warfarin for prevention was 3.3 (1.52), if this new medication taken twice a day, the willingness to change to this new treatment is 3 (1.59). The willingness to change to this new treatment increased if it has no interaction with foods or beverage (4.1 (1.26)), and if it will cost the same                | Serious RoB |

| Study ID   | Study design                | Country | Funding source         | Population description                                                                                             | Sample size | Sampling strategy | Response rate                                                              | Age (years)              | Male/female                    | Measurement methods                        | Description of health states | Unit                              | Results                                                                                                                                                                                                                                                                                                                                                                                                                                         | Overall RoB |
|------------|-----------------------------|---------|------------------------|--------------------------------------------------------------------------------------------------------------------|-------------|-------------------|----------------------------------------------------------------------------|--------------------------|--------------------------------|--------------------------------------------|------------------------------|-----------------------------------|-------------------------------------------------------------------------------------------------------------------------------------------------------------------------------------------------------------------------------------------------------------------------------------------------------------------------------------------------------------------------------------------------------------------------------------------------|-------------|
|            |                             |         |                        |                                                                                                                    |             |                   |                                                                            |                          |                                |                                            |                              |                                   | or less (3.9 (1.39)); and decreased if it will cost more (2.6 (1.49)).                                                                                                                                                                                                                                                                                                                                                                          |             |
| Enden 2013 | randomized controlled trial | Norway  | Governmental           | Patients (18–75 years) with a high proximal DVT, symptoms <21 days and no increased risk of bleeding were eligible | 189         | Random            | of 209 randomized, 189 were included in the analyses                       | Mean (SD): 51.5 (± 15.8) | male/female: 119/70 (63%/37%)  | EQ-5D utility                              | EQ-5D                        | Mean (95% Confidence interval)    | Generic QoL in CDT group (at 24 months): 0.80 (0.746 to 0.849)<br>Generic QoL in standard care (at 24 months): 0.84 (0.807 to 0.875);<br>Generic QoL in CDT group (at 6 months): 0.82 (0.780 to 0.856);<br>Generic QoL in standard care (at 6 months): 0.81 (0.777 to 0.852)                                                                                                                                                                    | Low RoB     |
| Geyer 2014 | Cross-sectional study       | USA     | Private not for profit | patients visiting emergency department, subgroup of patients with a previous PE                                    | 203         | Consecutive       | 100% (203 (65.9%) enrolled of 308 screened, actually not all 308 eligible) | Mean (SD): 55 (± 17)     | male/female: 123/80 (63%/37%)  | forced choice: diagnosis preferences       | Booklet/card                 | Choice or proportion of choice    | 128 (63%) subjects indicated that they would prefer to have CT-PA<br>74 (37%) of patients indicated that they would decline CT-PA testing if they had a D-dimer above normal but less than twice normal (500-1000 ng/mL) and low clinical probability of PE                                                                                                                                                                                     | Low RoB     |
| Haac 2006I | RCT                         | USA     | Private not for profit | patients treated with pelvic or acetabular fractures or an operative extremity fracture                            | 232         | Consecutive       | 100% of (all eligible - the ones who refused to participate)               | Mean (SD): 47.9 (± 17.7) | male/female: 132/100 (57%/43%) | Discrete choice exercise/conjoint analysis | Booklet/card                 | Relative importance of attributes | Patients most strongly preferred a reduction in risk of death by PE, distantly followed by a reduction in the risk of VTE requiring therapeutic anticoagulation, wound complications requiring another surgery, and bleeding complications requiring a transfusion. Patients preferred oral pills over subcutaneous injections. Preferences changed in favor of injections with an absolute risk reduction of 6.98% in bleeding, 4.53% in wound | Low RoB     |

| Study ID  | Study design     | Country | Funding source | Population description                                                                                                                                                                                                                                           | Sample size | Sampling strategy | Response rate | Age (years)              | Male/female                    | Measurement methods                                      | Description of health states                                                           | Unit                         | Results                                                                                                                                                                                                                                                                                                                                                                                                                                                                                                                                   | Overall RoB  |
|-----------|------------------|---------|----------------|------------------------------------------------------------------------------------------------------------------------------------------------------------------------------------------------------------------------------------------------------------------|-------------|-------------------|---------------|--------------------------|--------------------------------|----------------------------------------------------------|----------------------------------------------------------------------------------------|------------------------------|-------------------------------------------------------------------------------------------------------------------------------------------------------------------------------------------------------------------------------------------------------------------------------------------------------------------------------------------------------------------------------------------------------------------------------------------------------------------------------------------------------------------------------------------|--------------|
|           |                  |         |                |                                                                                                                                                                                                                                                                  |             |                   |               |                          |                                |                                                          |                                                                                        |                              | complications requiring reoperation, 1.27% in VTE, and 0.07% in death from pulmonary embolism (PE).                                                                                                                                                                                                                                                                                                                                                                                                                                       |              |
| Hogg 2013 | cohort study     | Canada  | NR             | Any patient attending the Thrombosis Clinic who had been diagnosed as having either lower extremity DVT or PE at any time was eligible to participate. Patients with a history of upper extremity thrombosis or unusual site thrombosis alone were not included. | 216         | Consecutive       | NR            | Mean (SD): 56 (± 16)     | male/female: 113/103 (53%/47%) | Standard gamble                                          | Verbal description, Visual portrayal/aid or Pictorial descriptions of risk (pictogram) | Median (Interquartile range) | deep vein thrombosis: 0.81 (0.55-0.94)<br>pulmonary embolism: 0.75 (0.45-0.91)<br>minor intracranial bleeding event: 0.75 (0.55-0.92)<br>gastrointestinal tract bleeding event: 0.65 (0.15-0.86)<br>major intracranial bleeding event: 0.15 (0.00-0.65)                                                                                                                                                                                                                                                                                   | Moderate RoB |
| Hogg 2014 | repeated surveys | Canada  | No funding     | Thrombosis clinic patients treated for venous thrombosis                                                                                                                                                                                                         | 44          | NR                | NR            | Median (IQR): 55 (41-68) | male/female: 28/16 (64% / 36%) | Standard gamble and visual analogue scale, SF-6D utility | SF-12/SF-36 and Computer program or Software                                           | Median (Interquartile range) | Entire cohort with standard gamble: 0.97 (0.84 - 1.0)<br>Pulmonary embolism with standard gamble: 0.93 (0.82 - 1.0)<br>Deep vein thrombosis with standard gamble: 0.99 (0.85 - 1.0)<br>Entire cohort with SF-6D: 0.64 (0.59 - 0.80)<br>Pulmonary embolism with SF-6D: 0.68 (0.62 - 0.84)<br>Deep vein thrombosis with SF-6D: 0.64 (0.58 - 0.69)<br>Entire cohort with visual analogue scale: 70 (60 - 80)<br>Pulmonary embolism with visual analogue scale: 70 (60 - 80)<br>Deep vein thrombosis with visual analogue scale: 65 (50 - 80) | Moderate RoB |



| Study ID      | Study design           | Country | Funding source                            | Population description                                                                                                                                                                                                         | Sample size | Sampling strategy | Response rate   | Age (years)                         | Male/female                   | Measurement methods                  | Description of health states | Unit                              | Results                                                                                                                                                                                                                                                                                                                                                                                                                                                                                                  | Overall RoB  |
|---------------|------------------------|---------|-------------------------------------------|--------------------------------------------------------------------------------------------------------------------------------------------------------------------------------------------------------------------------------|-------------|-------------------|-----------------|-------------------------------------|-------------------------------|--------------------------------------|------------------------------|-----------------------------------|----------------------------------------------------------------------------------------------------------------------------------------------------------------------------------------------------------------------------------------------------------------------------------------------------------------------------------------------------------------------------------------------------------------------------------------------------------------------------------------------------------|--------------|
| Keita 2017    | cross-sectional survey | France  | NR                                        | outpatients receiving anticoagulation therapy by VKA or by DOAC                                                                                                                                                                | 100         | Consecutive       | 95% (100/105)   | Mean (SD): 60.4 (18.6) [IQR: 46–78] | male/female: 54%/46%          | EQ-5D and PACT-Q2                    | EQ-5D and PACT-Q2            | Mean (SD) and Interquartile range | EQ-VAS with DOAC 3 months: 70.2<br>EQ-VAS with VKA 3 months: 60.7<br>Satisfaction with DOAC treatment: 75.9 (8.5) [69–80]<br>Satisfaction with VKA treatment: 71.3 (9.0) [66–77]<br>Satisfaction with DOAC treatment: 88.0 (4.4) [85–91]<br>Satisfaction with VKA treatment: 81.5 (7.4) [78–88]                                                                                                                                                                                                          | Low RoB      |
| Lattimer 2013 | cohort study           | UK      | Private not for profit                    | 34 consecutive patients (40 legs) with post-thrombotic syndrome PTS. Patients were given a study appointment a week later and requested to wear their usual compression as prescribed by the vascular surgeon or family doctor | 34          | Consecutive       | NA              | Median 62                           | male/female: 28/6 (82% / 18%) | Forced choice: treatment preferences | no description               | Choice or proportion of choice    | Patients were questioned on their use of compression to determine compliance. The results were not used (7/34, 20.6%), intermittent use (3/34, 8.8%), most days (3/34, 8.8%), and full compliance (21/34, 61.8%). After the study session, 21 of 40 (52.5%) participants indicated they wanted to change their compression, and 38% of these (8/21 patients) preferred an above-knee thigh-length stocking. The results indicate an above-knee thigh-length stocking may be preferable in many patients. | Serious RoB  |
| Lemke 2016    | cross-sectional survey | Canada  | Unrestricted grant from Sanofi, partially | Patients prescribed with prophylactic LMWH for 28 days following discharge from hospital for a liver or pancreas resection                                                                                                     | 100         | Consecutive       | 68.0% (100/147) | Median: 62 (IQR: 51, 71)            | male/female: 42%/58%          | Ad-hoc developed questionnaire       | no description               | proportion of choice              | The most frequent reasons for non-adherence were that a healthcare provider stopped the regimen or because of poor experience with injections. Over half the patients (55.7 %) did not find the injections bothersome.                                                                                                                                                                                                                                                                                   | Serious RoB  |
| Lenert 1997   | quasi randomized trial | USA     | Governmental                              | 30 healthy women                                                                                                                                                                                                               | 60          | voluntary         | NR              | Median: 35                          | male/female: 16/44            | standard gamble                      | Computer program             | Median (95% Confidence interval)  | Mild Post-thrombotic syndrome by standard gamble: 1.00 (0.91–1.00)                                                                                                                                                                                                                                                                                                                                                                                                                                       | Moderate RoB |

| Study ID     | Study design          | Country                                                                | Funding source                   | Population description                                                                                                                                                                                                                                       | Sample size | Sampling strategy | Response rate | Age (years)                                          | Male/female          | Measurement methods          | Description of health states | Unit                            | Results                                                                                                                                                                                                                                                                                                                                                                                                                                                                                                                                                                                                                                                                                                           | Overall RoB |
|--------------|-----------------------|------------------------------------------------------------------------|----------------------------------|--------------------------------------------------------------------------------------------------------------------------------------------------------------------------------------------------------------------------------------------------------------|-------------|-------------------|---------------|------------------------------------------------------|----------------------|------------------------------|------------------------------|---------------------------------|-------------------------------------------------------------------------------------------------------------------------------------------------------------------------------------------------------------------------------------------------------------------------------------------------------------------------------------------------------------------------------------------------------------------------------------------------------------------------------------------------------------------------------------------------------------------------------------------------------------------------------------------------------------------------------------------------------------------|-------------|
|              |                       |                                                                        |                                  |                                                                                                                                                                                                                                                              |             |                   |               |                                                      | (27%/73%)            |                              | or Software                  |                                 | Severe Post-thrombotic syndrome by standard gamble: 0.95 (0.79–1.00)<br>Central nervous system bleeding by standard gamble: 0.60 (0.02–1.00)                                                                                                                                                                                                                                                                                                                                                                                                                                                                                                                                                                      |             |
| Lloyd 2017   | RCT                   | multinational: 32 countries (Canada, USA, France; Germany, Denmark...) | LeoPharm A/S (Ballerup, Denmark) | Patients with active cancer                                                                                                                                                                                                                                  | 877         | NR                | 99% (877/883) | <51.5years:25%, 51.5-60y:24%; 60-68y:25%; 68-89y:27% | male/female: 41%/59% | EQ-5D utility (rating scale) | EQ-5D                        | Mean ((95% Confidence interval) | Symptomatic nonfatal-DV: 0.605 (0.514 - 0.678)<br>Symptomatic nonfatal-PE: 0.621 (0.477 - 0.725)<br>Fatal PE: 0.456 (0.268 - 0.595)<br>Recurrent VTE: 0.570 (0.485 - 0.641)<br>Major bleeding: 0.593 (0.461 - 0.693)<br>Clinically relevant nonmajor bleeding: 0.622 (0.568 - 0.669)                                                                                                                                                                                                                                                                                                                                                                                                                              | Low RoB     |
| Locadia 2004 | cross-sectional study | Netherlands                                                            | Governmental                     | 3 groups (a) Newly diagnosed patients with a first or second episode of venous thromboembolism for whom treatment with vitamin K antagonists had been started; (b) patients who had experienced an episode of major bleeding during treatment with vitamin K | 124         | Consecutive       | 124/159       | Mean: 53 range: 21 to 85                             | male/female: 47%/53% | time trade off               | Verbal description           | Choice or proportion of choice  | Patients were asked to advise a hypothetical close friend for treatment with vitamin K antagonists after an episode of venous thromboembolism. Continuation of treatment would involve regular blood tests, a tendency to bruise and bleed more readily, a 3% chance of a major bleeding event, and a 2% chance of a recurrent episode of venous thromboembolism in the next 2 years. When the probability of a recurrent episode of venous thromboembolism without treatment were changed to 5%, 10% and 15%, 21%, 23% and 8% of participants would advise to stop the treatment. Meanwhile, 25% of the participants would always advise cessation of treatment, and 23% would always advise continue treatment. | Low RoB     |

| Study ID       | Study design           | Country          | Funding source         | Population description                                                                                                                                                                                                           | Sample size | Sampling strategy  | Response rate | Age (years)              | Male/female           | Measurement methods    | Description of health states            | Unit                           | Results                                                                                                                                                                                                                                                                                                                                                                                                                                                                                                                                                                                                                                   | Overall RoB  |
|----------------|------------------------|------------------|------------------------|----------------------------------------------------------------------------------------------------------------------------------------------------------------------------------------------------------------------------------|-------------|--------------------|---------------|--------------------------|-----------------------|------------------------|-----------------------------------------|--------------------------------|-------------------------------------------------------------------------------------------------------------------------------------------------------------------------------------------------------------------------------------------------------------------------------------------------------------------------------------------------------------------------------------------------------------------------------------------------------------------------------------------------------------------------------------------------------------------------------------------------------------------------------------------|--------------|
|                |                        |                  |                        | antagonists in the previous year; (c) patients with a post-thrombotic syndrome, diagnosed at least one year after an episode of deep vein thrombosis, who had been treated with vitamin K antagonists for at least three months. |             |                    |               |                          |                       |                        |                                         | Median (Interquartile range)   | non-fatal hemorrhagic stroke: 0.33 (0.14,0.53)<br>Post-thrombotic syndrome: 0.82 (0.66 to 0.97)<br>no treatment with VKA: 0.96 (0.82 to 1)<br>patients' own current health: 0.95 (0.81 to 1)<br>DVT: 0.84 (0.64 to 0.98)<br>Pulmonary embolism: 0.63 (0.36 to 0.86)<br>GI bleeding: 0.65 (0.49 to 0.86)<br>muscular bleeding: 0.76 (0.59 to 0.95)<br>treatment with VKA: 0.92 (0.77 to 0.98)                                                                                                                                                                                                                                              |              |
| Lutsey 2018    | cross-sectional survey | USA              | non-sponsored McKnight | VTE patients                                                                                                                                                                                                                     | 519         | in clinic + online | 99% (519/521) | Mean (SD): 45.7 (+ 13.1) | male/female: 17%/83%  | Agreement rating scale | booklet/printed survey or online survey | Choice or proportion of choice | Proportions reporting being extremely concerned about the following outcomes were as follows: recurrent VTE 33%, major bleeding 21%, moderate bleeding 16% and all-cause death 29%. When asked about oral anticoagulant characteristics, patients strongly preferred anticoagulants that are reversible (53%), and for which blood drug levels can be monitored (30%). Lower proportions agreed with statements that regular blood testing is inconvenient (18%), that they are comfortable using the newest drug versus an established drug (15%) and that it is difficult to change their diet to accommodate their anticoagulant (17%) | Serious RoB  |
| Marchetti 2001 | cross-sectional study  | Italy            | NR                     | patients attending the local anticoagulation clinic                                                                                                                                                                              | 48          | NR                 | NR            | Mean (SD): 57 (±15)      | NR                    | time trade off         | Other, written description of two cases | Mean (SD)                      | treatment with warfarin: 0.989 (0.016)<br>treatment with LMWH: 0.993 (0.024)                                                                                                                                                                                                                                                                                                                                                                                                                                                                                                                                                              | Moderate RoB |
| Marvig 2015    | repeated survey        | The Netherlands, | Private for profit     | patients with venous thromboembolism                                                                                                                                                                                             | VTE:187,    | NR                 | NR            | Mean (SD): VTE:57.5 (±   | male/female: VTE:105/ | EQ-5D VAS,             | EQ-5D                                   | Mean (Interquartile range)     | QOL in VTE patients by EQ-5D in baseline: 0.68 (0.62-0.85)                                                                                                                                                                                                                                                                                                                                                                                                                                                                                                                                                                                | Moderate RoB |

| Study ID     | Study design                                     | Country                            | Funding source     | Population description                                       | Sample size | Sampling strategy | Response rate | Age (years)                                                                                                 | Male/female          | Measurement methods                        | Description of health states | Unit                              | Results                                                                                                                                                                                                                                                                                                                                                                                                                                                                                                                                                                                                                                                                                                                  | Overall RoB  |
|--------------|--------------------------------------------------|------------------------------------|--------------------|--------------------------------------------------------------|-------------|-------------------|---------------|-------------------------------------------------------------------------------------------------------------|----------------------|--------------------------------------------|------------------------------|-----------------------------------|--------------------------------------------------------------------------------------------------------------------------------------------------------------------------------------------------------------------------------------------------------------------------------------------------------------------------------------------------------------------------------------------------------------------------------------------------------------------------------------------------------------------------------------------------------------------------------------------------------------------------------------------------------------------------------------------------------------------------|--------------|
|              |                                                  | Sweden, United Kingdom, and Greece | Governmental       | and atrial fibrillation treated with coumarin anticoagulants | AF:660      |                   |               | 16.6), AF:72.0 (± 9.7)                                                                                      | 82, AF:412/248       | EQ-5D utility                              |                              |                                   | QOL in VTE patients by EQ-VAS in baseline: 65.7 (50.8-80.0)                                                                                                                                                                                                                                                                                                                                                                                                                                                                                                                                                                                                                                                              |              |
| Maxwell 2002 | randomized controlled trial                      | USA                                | Private for profit | Women >40y old with a suspected gynecologic malignancy       | 211         | Consecutive       | NR            | Median (range) of 61(35 to 85) in the LMWH group; 60 (41 to 87) in the external pneumatic compression group | all female           | forced choice: treatment preferences       | Verbal description           | Choice or proportion of choice    | In a randomized controlled trial, patients were randomized to accept either external pneumatic compression or low molecular weight heparin. Patient preference results suggested tendency for patients to prefer the method of prophylaxis to which they were randomly assigned. The postoperative preferences of 78% of patients receiving low molecular weight heparin and 74% of those wearing external pneumatic compression corresponded to what the patients actually received as a method of thromboembolism prevention. Only 4% of low molecular weight heparin patients and 3% of external pneumatic compression patients chose the alternative method of prophylaxis in their postoperative preference survey. | Serious RoB  |
| Noble 2015a  | Cross-sectional study and qualitative interviews | Germany, UK                        | Private for profit | cancer-associated thrombosis patients                        | 100         | NR                | NR            | Mean: 57                                                                                                    | male/female: 45%/55% | discrete choice exercise/conjoint analysis | Verbal description           | Relative importance of attributes | In a conjoint analysis, participants with cancer-related thrombosis were asked to consider the relative importance of efficacy, risk of minor and major bleeding, interference with cancer treatment, administration form and frequency, and monitoring. Patients would place more importance on decreased risks of new or recurring blood clot, decreased risks of minor and major bleeding, no interference with cancer treatment, tablet rather than injection, and once daily rather than twice daily, and less frequent monitoring. The attribute with the highest relative importance for patients was the interference with cancer treatment (39%), followed by efficacy of the VTE treatment                     | Moderate RoB |

| Study ID     | Study design          | Country | Funding source         | Population description                                         | Sample size | Sampling strategy | Response rate                  | Age (years)                  | Male/female                                   | Measurement methods                                              | Description of health states | Unit                                  | Results                                                                                                                                                                                                                                                                                                                                                                                     | Overall RoB  |
|--------------|-----------------------|---------|------------------------|----------------------------------------------------------------|-------------|-------------------|--------------------------------|------------------------------|-----------------------------------------------|------------------------------------------------------------------|------------------------------|---------------------------------------|---------------------------------------------------------------------------------------------------------------------------------------------------------------------------------------------------------------------------------------------------------------------------------------------------------------------------------------------------------------------------------------------|--------------|
|              |                       |         |                        |                                                                |             |                   |                                |                              |                                               |                                                                  |                              |                                       | (24%), and the risk of major bleeding (19%). The administration form of the VTE treatment seems to have moderate importance (13%), whereas risk of minor bleeds (2%), monitoring through blood tests (2%), and frequency of administration of the VTE drug (1%) are of minor relevance.                                                                                                     |              |
| O'Meara 1994 | cross-sectional study | USA     | NR                     | 20 patients had not had DVT and 16 patients with this syndrome | 36          | Random            | NR                             | >50                          | NR                                            | standard gamble                                                  | Verbal description           | Choice or proportion of choice        | None of the participants was willing to accept an increased risk of death to avoid postphlebotic syndrome.                                                                                                                                                                                                                                                                                  | Moderate RoB |
|              |                       |         |                        |                                                                |             |                   |                                |                              |                                               |                                                                  |                              | Mean (95% Confidence interval); range | Mild postphlebotic syndrome: 0.995 (0.990-1.00); 0.99-1.0<br>Severe postphlebotic syndrome: 0.982 (0.962-1.00); 0.90-1.0<br>Central nervous system bleeding: 0.290 (0.127-0.453); 0.0-0.90<br>Mild postphlebotic syndrome: 0.995<br>Severe postphlebotic syndrome: 0.977<br>Central nervous system bleeding: 0.29<br>Mild postphlebotic syndrome: 0.997<br>Severe postphlebotic syndrome: 1 |              |
| Popoola 2016 | Cross-sectional study | USA     | Private not for profit | VTE patients and their family member                           | 421         | NR                | Phase 2: 53.9%; Phase 3: 51.1% | Median (IQR):47.0 (37–58)    | Male/Female: 88/331 (21% / 79%), not answer:2 | forced choice: preferred route of VTE prophylaxis administration | Other, web-based survey tool | Choice or proportion of choice        | When being asked the preferred route of VTE prophylaxis administration, 78.4% chose pill, 5.3% chose injection and 13.7% had no preference.                                                                                                                                                                                                                                                 | Critical RoB |
| Quante 2012  | Cross-sectional study | Germany | Private for profit     | patients who had undergone elective hip or knee endoprosthesis | 178         | NR                | NR                             | Mean: 68.4 (range: 26 to 88) | NR                                            | forced choice: treatment                                         | no description               | Choice or proportion of choice        | 71.9% of the respondents preferred oral treatment and 14.61 % favored the daily subcutaneous injection. The reasons of preferring oral treatment included easier to                                                                                                                                                                                                                         | Serious RoB  |

| Study ID       | Study design                | Country | Funding source | Population description                                                                                                                                                   | Sample size | Sampling strategy | Response rate | Age (years)           | Male/female                   | Measurement methods                  | Description of health states | Unit                           | Results                                                                                                                                                                                                                                                                                                                                                                                                                                                                                                                                                                                                                                                                                                                                                                                                                                                                                        | Overall RoB |
|----------------|-----------------------------|---------|----------------|--------------------------------------------------------------------------------------------------------------------------------------------------------------------------|-------------|-------------------|---------------|-----------------------|-------------------------------|--------------------------------------|------------------------------|--------------------------------|------------------------------------------------------------------------------------------------------------------------------------------------------------------------------------------------------------------------------------------------------------------------------------------------------------------------------------------------------------------------------------------------------------------------------------------------------------------------------------------------------------------------------------------------------------------------------------------------------------------------------------------------------------------------------------------------------------------------------------------------------------------------------------------------------------------------------------------------------------------------------------------------|-------------|
|                |                             |         |                | within the last 6 weeks and to which subcutaneously low molecular weight heparins were administered subcutaneously for thrombotic prophylaxis at the time of observation |             |                   |               |                       |                               | preferences                          |                              |                                | take (86.6%), less cost than administering a syringe (73.1%), another tablet not mattering since other tablets needing to be taken (70.9%), faster than administering a syringe (67.2%), feeling more mobile (66.4%), less painful than administering a syringe in the abdomen (65.7%) and easier to integrate into the daily routine (59.7%).<br>The reasons of preferring injection treatment included appearing safer to administer the drug compared to the tablet (55.3%), more effective than a tablet (47.4%), easier to take (31.6%), faster than taking a tablet (21.1%), problems with tablet swallowing and therefore preference for a syringe (18.4%), being less forgotten in daily life than taking a tablet (15.8%), less expensive than taking a tablet (7.9%), less painful than taking a tablet (5.3%), another injection not matter in addition to other injections (2.6%). |             |
| Robertson 2000 | Cohort study                | USA     | NR             | Patients having primary or revision total joint arthroplasty                                                                                                             | 35          | consecutive       | NR            | NR                    | NR                            | forced choice: treatment preferences | No described                 | Choice or proportion of choice | Of a subgroup' of 35 patients who had used both devices: 24 preferred the foot pump, 7 the SCD, and 4 had no preference                                                                                                                                                                                                                                                                                                                                                                                                                                                                                                                                                                                                                                                                                                                                                                        | Serious RoB |
| Robinson 1993  | randomized controlled trial |         | NR             | Patients with venographically proven deep venous thrombosis were randomized to receive subcutaneous or intravenous heparin for 3 days followed by 3 days                 | 20          | Random            | 19/20         | Mean: 55, range: 20-8 | male/female: 7/13 (35% / 65%) | forced choice: treatment preferences | Verbal description           | Choice or proportion of choice | For patients with venographically proven deep venous thrombosis, 15 of the 19 patients expressed a preference for the subcutaneous route for administration of heparin. Two preferred the intravenous route and two gave no preference.                                                                                                                                                                                                                                                                                                                                                                                                                                                                                                                                                                                                                                                        | Serious RoB |

| Study ID    | Study design                 | Country | Funding source | Population description                                                                                                                   | Sample size             | Sampling strategy | Response rate                              | Age (years)                                                                                          | Male/female                                                    | Measurement methods                                            | Description of health states | Unit                           | Results                                                                                                                                                                                                                                                                                                                | Overall RoB |
|-------------|------------------------------|---------|----------------|------------------------------------------------------------------------------------------------------------------------------------------|-------------------------|-------------------|--------------------------------------------|------------------------------------------------------------------------------------------------------|----------------------------------------------------------------|----------------------------------------------------------------|------------------------------|--------------------------------|------------------------------------------------------------------------------------------------------------------------------------------------------------------------------------------------------------------------------------------------------------------------------------------------------------------------|-------------|
|             |                              |         |                | of the other treatment.                                                                                                                  |                         |                   |                                            |                                                                                                      |                                                                |                                                                |                              |                                |                                                                                                                                                                                                                                                                                                                        |             |
| Rymes 2002  | cohort study (retrospective) | UK      | NR             | patients with a newly diagnosed DVT                                                                                                      | 344 (172 in each group) | NR                | NR                                         | mean 60.3 (range: 20-88) for patients treated at home; 60.3 (20-96) for patients treated at hospital | male/female: Home: 41/131(41%/59%) hospital: 74/97 (43% / 57%) | forced choice: place of treatment                              | no description               | Choice or proportion of choice | 79% of 172 respondents preferred treatment at home whilst 12% would have preferred to have been treated as inpatients. Nine per cent expressed no preference. Of all these respondents, 15 patients who had suffered a previous DVT for which they were treated in hospital stated that they preferred home treatment. | Serious RoB |
| Sousou 2010 | Cross-sectional study        | USA     | Governmental   | ambulatory cancer patients at the James P. Wilmot Cancer Center at the University of Rochester                                           | 190                     | NR                | 76.00%                                     | 58 (Range: 21 to 95)                                                                                 | male/female: 71/119 37%/63%                                    | forced choice: treatment preferences                           | no description               | Choice or proportion of choice | Regarding thromboprophylaxis, 87 patients (46%) were willing to administer daily injections of anticoagulants, whereas 163 patients (86%) were willing to use daily oral anticoagulants.                                                                                                                               | Serious RoB |
| Spahn 2002  | Cross-sectional study        | Germany | NR             | patients undergoing arthroscopy of the knee joint who required thromboembolic prophylaxis with LMWH in the peri- and postoperative stage | 300                     | NR                | 69% (207/300)                              | 26 patients were < 20, 82 between 20 and 40, 51 between 40 and 60, and 48 patients > 60 years old.   | male/female: 83%/17%                                           | Contingent choice (questionary with predefined answer options) | Booklet/card                 | Choice or proportion of choice | Only 81.2% of these patients would prefer self-injection in the same situation. Problems with self-injection were seen in 34.8% initially and in 6.3% the whole time.                                                                                                                                                  | Serious RoB |
| Tavoly 2016 | Cross-sectional study        | Norway  | no funding     |                                                                                                                                          | 213                     | Consecutive       | 54% (Of the 406 remaining and thus invited | mean (SD): 61 (± 15)                                                                                 | male/female: 117/96 (55%/45%)                                  | EQ-5D-3L                                                       | VAS                          | Mean                           | Mean (EQ VAS) was 67 in PE as compared with 81 in the general population (p<0.005), Shorter 6 min walking distance (β=0.09, p<0.005) and patient-reported dyspnoea (β=11.27, p<0.005) were independent predictors of lower EQ VAS scores.                                                                              | Low RoB     |

| Study ID         | Study design          | Country | Funding source         | Population description                                                                                                                                                                                                                                                                                                                                  | Sample size | Sampling strategy | Response rate                                | Age (years)                              | Male/female                     | Measurement methods             | Description of health states | Unit                                    | Results                                                                                                                                                                                                                                                                                            | Overall RoB  |
|------------------|-----------------------|---------|------------------------|---------------------------------------------------------------------------------------------------------------------------------------------------------------------------------------------------------------------------------------------------------------------------------------------------------------------------------------------------------|-------------|-------------------|----------------------------------------------|------------------------------------------|---------------------------------|---------------------------------|------------------------------|-----------------------------------------|----------------------------------------------------------------------------------------------------------------------------------------------------------------------------------------------------------------------------------------------------------------------------------------------------|--------------|
|                  |                       |         |                        |                                                                                                                                                                                                                                                                                                                                                         |             |                   | patients, 189 (46%) declined to participate) |                                          |                                 |                                 |                              |                                         |                                                                                                                                                                                                                                                                                                    |              |
| Utne 2016        | Cross-sectional study | Norway  | Private not for profit | patients with confirmed DVT                                                                                                                                                                                                                                                                                                                             | 254         | Consecutive       | 254 of 721                                   | Mean (SD): 60 (± 13)                     | male/female: 167/87 (66% / 34%) | EQ-5D utility                   | EQ-5D                        | Mean (SD)                               | EQ-5D index value in patients with confirmed DVT: 0.79 (0.20)<br>EQ-5D VAS value in patients with confirmed DVT: 72 (19)                                                                                                                                                                           | Critical RoB |
| Van Korlaar 2005 | Cross-sectional study | USA     | Governmental           | asymptomatic members of a large family with heritable protein C deficiency, including participants who had not been tested before (group 1), participants with protein C deficiency (group 2), and participants without protein C deficiency (group 3). Most of the participants who were tested before (group 2 and 3) were tested in a previous study | 168         | NR                | 74.70%                                       | Mean (SD): 44.4 (± 14.2), range: 18 to 7 | male/female: 73/95 (43%/57%)    | forced choice: test preferences | no description               | Mean (SD)                               | A survey was conducted on members within a large family with heritable protein C deficiency. For those who had not been tested before, in a 7-point scale with 1 (not at all interested) to 7 (extremely interested), the mean score of test interest was 4.6, with the standard deviation of 2.4. | Serious RoB  |
| Westrich 2003    | Cohort study          | USA     | NR                     | patients who underwent primary unilateral TKA and who were using pneumatic                                                                                                                                                                                                                                                                              | 100         | Consecutive       | 100%                                         | NR                                       | NR                              | rating scale                    | no description               | Mean and Choice or proportion of choice | Importance of the PlexiPulse foot pump for preventing blood clots after surgery: 7.09 (scale 1-9)                                                                                                                                                                                                  | Moderate RoB |



| Study ID      | Study design                | Country | Funding source     | Population description                                                                                              | Sample size                                                   | Sampling strategy | Response rate | Age (years)                                                                                                     | Male/female                      | Measurement methods                        | Description of health states | Unit                              | Results                                                                                                                                                                                                                                                                                                                                                                                                                                                                                                                                                               | Overall RoB |
|---------------|-----------------------------|---------|--------------------|---------------------------------------------------------------------------------------------------------------------|---------------------------------------------------------------|-------------------|---------------|-----------------------------------------------------------------------------------------------------------------|----------------------------------|--------------------------------------------|------------------------------|-----------------------------------|-----------------------------------------------------------------------------------------------------------------------------------------------------------------------------------------------------------------------------------------------------------------------------------------------------------------------------------------------------------------------------------------------------------------------------------------------------------------------------------------------------------------------------------------------------------------------|-------------|
|               |                             |         |                    | mechanical compression prophylaxis                                                                                  |                                                               |                   |               |                                                                                                                 |                                  |                                            |                              |                                   |                                                                                                                                                                                                                                                                                                                                                                                                                                                                                                                                                                       |             |
| Wilke 2009    | randomized controlled trial | Germany | Private for profit | 73 doctors in 12 German hospitals; 195 current hip and knee replacement patients; 202 former thromboprophylaxis pts | Total of 397 pts, 195 "current pts", 202 "former pts"         | Consecutive       | all           | Mean (SD): 69 ( $\pm$ 70)                                                                                       | male/female: 163/234 (41%/59%)   | discrete choice exercise/conjoint analysis | Booklet/card                 | Relative importance of attributes | This discrete choice exercise suggested the dosage form of thromboprophylaxis is the most influential factor of decision, and the extra daily payments were the second most important factor. The participants would prefer oral formulation compared with injection, especially for current patients in rehabilitation hospitals, aged >60 years, males, and who felt strongly discomforted by daily LMWH injections. The participants prefer blood taking every 5 <sup>th</sup> day compared with no blood taking.                                                  | Low RoB     |
| Williams 2006 | cross-sectional survey      | UK      | NR                 | patients admitted to the unit for total knee joint replacement                                                      | 47                                                            | Consecutive       | 94%(47/50)    | Mean 72 in below-knee stockings, and 70 in above-knee stockings group                                           | male/female: 53%/47%             | Contingent choice                          | no description               | narrative description             | all the female patients would have preferred to wear below-knee stockings.                                                                                                                                                                                                                                                                                                                                                                                                                                                                                            | Serious RoB |
| Wong 2015     | Mixed methods survey        | USA     | NR                 | medical and surgical patients for pharmacologic VTE prophylaxis                                                     | 227 (enteral group : 137; parenteral: 62; no preference : 28) | Consecutive       | 84.40%        | Mean (SD): enteral group: 49.5 ( $\pm$ 14.7); parenteral: 51.7 ( $\pm$ 16.1); no preference: 48.9 ( $\pm$ 14.6) | enteral group: 127/100 (56%/44%) | forced choice: treatment preferences       | no description               | Mean (SD)                         | 137 (60.4%) of the patients preferred enteral route and 62 (27.5%) of patients preferred injection route. For patients preferring enteral route, the stated reasons of preferences included: dislike of needles (41, 30.0%), pain from injection (38, 27.7%), ease of use (18, 13.1%), bruising from injection (9, 6.6%), other/no rationale (31, 22.6%); For patients preferring injection route, the stated reasons of preferences included faster onset of action (25, 40.3%), pill burden (11, 17.7%), ease of use (9, 14.5%) and other/no rationale (17, 27.5%). | Serious RoB |

| Study ID        | Study design          | Country | Funding source | Population description                   | Sample size | Sampling strategy | Response rate | Age (years)               | Male/female                    | Measurement methods                  | Description of health states | Unit                           | Results                                                                                                                                                                                                                                                                                                                                                                                                                                                                                                                                                                                                                                                                                                                                                                                                                                                                                                                                                                                                                                                                                                                                        | Overall RoB |
|-----------------|-----------------------|---------|----------------|------------------------------------------|-------------|-------------------|---------------|---------------------------|--------------------------------|--------------------------------------|------------------------------|--------------------------------|------------------------------------------------------------------------------------------------------------------------------------------------------------------------------------------------------------------------------------------------------------------------------------------------------------------------------------------------------------------------------------------------------------------------------------------------------------------------------------------------------------------------------------------------------------------------------------------------------------------------------------------------------------------------------------------------------------------------------------------------------------------------------------------------------------------------------------------------------------------------------------------------------------------------------------------------------------------------------------------------------------------------------------------------------------------------------------------------------------------------------------------------|-------------|
| Zolfaghari 2015 | Cross-sectional study | Germany | NR             | patients accepting anticoagulant therapy | 1001        | NR                | NR            | Mean (SD): 66.97 (± 11.9) | Male/Female: 633/368 (63%/37%) | forced choice: treatment preferences | no description               | Choice or proportion of choice | <p>Overall, 690 patients were treated with VKA (group 1), 155 patients had changed AC from VKA to NOAC (group 2), 137 were treated by NOAC de novo (group 3), and 19 patients changed therapy from NOAC to VKA (group 4). The patients in group 4 switched AC from NOAC to VKA due to complications such as hair loss after 9 months of treatment or general discomfort, due to fear of side effects on NOAC, or nonreimbursement by the health insurer.</p> <p>Patients in group 3 had fewer thoughts on alternative anticoagulation in the past, compared with group 1 and 2. Patients in group 1 had lower expectation for improved quality of life with a new anticoagulant compared with group 2 and 3, because patients do not expect that changing therapy from VKA to NOAC would improve quality of life or because they may have constraints with the NOAC.</p> <p>As for the statement "I have a wish of a lack of routine monitoring for dose adjustment of anticoagulant therapy", patients of groups 1 and 4 assigned low values to this statement, because blood sampling does not represent a limitation to adjust the INR.</p> | Serious RoB |

Table 4S. Summary of RoB for Utility and Non-utility quantitative studies

| Study            | OVERALL RoB  |   | Risk of bias for sampling | Risk of bias for response rate | Risk of bias for measurement instrument | Risk of bias for Intended use of measurement | Risk of bias for health state presentation | Risk of bias for Understanding | Risk of bias for data analysis |
|------------------|--------------|---|---------------------------|--------------------------------|-----------------------------------------|----------------------------------------------|--------------------------------------------|--------------------------------|--------------------------------|
| Anand 2007       | Moderate RoB | ⇒ | Low RoB                   | Low RoB                        | Serious RoB                             | Low RoB                                      | Low RoB                                    | Low RoB                        | Low RoB                        |
| Baba 2015        | Serious RoB  | ⇒ | Unclear (moderate) RoB    | Unclear (moderate) RoB         | Serious RoB                             | Low RoB (probably)                           | Low RoB                                    | Low RoB                        | Low RoB                        |
| Barcelona 2000   | Serious RoB  | ⇒ | Low RoB                   | Unclear (moderate) RoB         | Serious RoB                             | Low RoB (probably)                           | Serious RoB                                | Low RoB                        | Low RoB                        |
| Bates 2016       | Low RoB      | ⇒ | Low RoB                   | Unclear (moderate) RoB         | Low RoB                                 | Low RoB                                      | Low RoB                                    | Low RoB                        | Low RoB                        |
| Bouman 2016      | Serious RoB  | ⇒ | Unclear (moderate) RoB    | Unclear (moderate) RoB         | Low RoB                                 | Low RoB                                      | Serious RoB                                | Low RoB                        | Low RoB                        |
| Brady 2007       | Serious RoB  | ⇒ | Low RoB                   | Low RoB                        | Serious RoB                             | Low RoB (probably)                           | Low RoB                                    | Low RoB                        | Low RoB                        |
| Brekelmans 2017  | Low RoB      | ⇒ | Low RoB                   | moderate RoB                   | Low RoB                                 | Low RoB                                      | Low RoB                                    | Low RoB                        | Low RoB                        |
| Cajfinger 2013   | Serious RoB  | ⇒ | Low RoB                   | Unclear (moderate) RoB         | Serious RoB                             | Low RoB (probably)                           | Serious RoB                                | Low RoB                        | Low RoB                        |
| Chan 2007        | Serious RoB  | ⇒ | Low RoB                   | Serious RoB                    | Serious RoB                             | Unclear (moderate) RoB                       | Serious RoB                                | Low RoB                        | Low RoB                        |
| Chioutan 2003 .  | Serious RoB  | ⇒ | Low RoB                   | Low RoB                        | Serious RoB                             | Unclear (moderate) RoB                       | Unclear (moderate) RoB                     | Low RoB                        | Low RoB                        |
| Dranitsaris 2016 | Low RoB      | ⇒ | Low RoB                   | Unclear (moderate) RoB         | Low RoB                                 | Low RoB                                      | Low RoB                                    | Low RoB                        | Low RoB                        |

| Study         | OVERALL RoB  |   | Risk of bias for sampling | Risk of bias for response rate | Risk of bias for measurement instrument | Risk of bias for Intended use of measurement | Risk of bias for health state presentation | Risk of bias for Understanding | Risk of bias for data analysis |
|---------------|--------------|---|---------------------------|--------------------------------|-----------------------------------------|----------------------------------------------|--------------------------------------------|--------------------------------|--------------------------------|
| Elewa 2014    | Serious RoB  | ⇒ | Unclear (moderate) RoB    | Low RoB                        | Serious RoB                             | Low RoB (probably)                           | Serious RoB                                | Low RoB                        | Low RoB                        |
| Enden 2013    | Low RoB      | ⇒ | Low RoB                   | Low RoB                        | Low RoB                                 | Low RoB (probably)                           | Low RoB                                    | Low RoB                        | Low RoB                        |
| Geyer 2014    | Low RoB      | ⇒ | Low RoB                   | Low RoB                        | Low RoB                                 | Low RoB                                      | Low RoB                                    | Low RoB                        | Low RoB                        |
| Haac 2017     | Low RoB      | ⇒ | Low RoB                   | Low RoB                        | Low RoB                                 | Low RoB (probably)                           | Low RoB                                    | Low RoB                        | Low RoB                        |
| Hogg 2013     | Moderate RoB | ⇒ | Low RoB                   | Unclear (moderate) RoB         | Low RoB                                 | Low RoB                                      | Low RoB                                    | Low RoB                        | Low RoB                        |
| Hogg 2014     | Moderate RoB | ⇒ | Unclear (moderate) RoB    | Unclear (moderate) RoB         | Low RoB                                 | Low RoB                                      | Low RoB                                    | Low RoB                        | Low RoB                        |
| Keita 2017    | Low RoB      | ⇒ | Low RoB                   | Low RoB                        | Low RoB                                 | Low RoB (probably)                           | Low RoB                                    | Low RoB                        | Low RoB                        |
| Lattimer 2013 | Serious RoB  | ⇒ | Low RoB                   | Unclear (moderate) RoB         | Serious RoB                             | Low RoB (probably)                           | Low RoB                                    | Low RoB                        | Low RoB                        |
| Lemke 2016    | Serious RoB  | ⇒ | Low RoB                   | Low RoB                        | Serious RoB                             | Unclear (moderate) RoB                       | Low RoB                                    | Low RoB                        | Low RoB                        |
| Lenert 1997   | Moderate RoB | ⇒ | Unclear (moderate) RoB    | Unclear (moderate) RoB         | Low RoB                                 | Low RoB                                      | Low RoB                                    | Low RoB                        | Low RoB                        |
| Lloyd 2017    | Low RoB      | ⇒ | Low RoB                   | Low RoB                        | Low RoB                                 | Low RoB (probably)                           | Low RoB                                    | Low RoB                        | Low RoB                        |
| Locadia 2004  | Low RoB      | ⇒ | Low RoB                   | Low RoB                        | Low RoB                                 | Low RoB                                      | Low RoB                                    | Low RoB                        | Low RoB                        |

| Study          | OVERALL RoB  |   | Risk of bias for sampling | Risk of bias for response rate | Risk of bias for measurement instrument | Risk of bias for Intended use of measurement | Risk of bias for health state presentation | Risk of bias for Understanding | Risk of bias for data analysis |
|----------------|--------------|---|---------------------------|--------------------------------|-----------------------------------------|----------------------------------------------|--------------------------------------------|--------------------------------|--------------------------------|
| Lutsey 2018    | Serious RoB  | ⇒ | Serious RoB               | Low RoB                        | Serious RoB                             | Low RoB (probably)                           | Low RoB                                    | Low RoB                        | Low RoB                        |
| Marchetti 2001 | Moderate RoB | ⇒ | Unclear (moderate) RoB    | Unclear (moderate) RoB         | Low RoB                                 | Low RoB                                      | Low RoB                                    | Low RoB                        | Low RoB                        |
| Marvig 2015    | Moderate RoB | ⇒ | Unclear (moderate) RoB    | Unclear (moderate) RoB         | Low RoB                                 | Low RoB (probably)                           | Low RoB                                    | Low RoB                        | Low RoB                        |
| Maxwell 2002   | Serious RoB  | ⇒ | Low RoB                   | Unclear (moderate) RoB         | Serious RoB                             | Low RoB (probably)                           | Low RoB                                    | Low RoB                        | Low RoB                        |
| Noble 2015a    | Moderate RoB | ⇒ | Unclear (moderate) RoB    | Unclear (moderate) RoB         | Low RoB                                 | Low RoB (probably)                           | Low RoB                                    | Low RoB                        | Low RoB                        |
| O'Meara 1994   | Moderate RoB | ⇒ | Low RoB                   | Unclear (moderate) RoB         | Low RoB                                 | Low RoB                                      | Low RoB                                    | Low RoB                        | Low RoB                        |
| Popoola 2016   | Critical RoB | ⇒ | Low RoB                   | Critical RoB                   | Serious RoB                             | Low RoB (probably)                           | Low RoB                                    | Low RoB                        | Low RoB                        |
| Quante 2012    | Serious RoB  | ⇒ | Unclear (moderate) RoB    | Unclear (moderate) RoB         | Serious RoB                             | Low RoB (probably)                           | Serious RoB                                | Low RoB                        | Low RoB                        |
| Robertson 2000 | Serious RoB  | ⇒ | Low RoB                   | Serious RoB                    | Serious RoB                             | Low RoB                                      | Low RoB                                    | Low RoB                        | Low RoB                        |
| Robinson 1993  | Serious RoB  | ⇒ | Low RoB                   | Low RoB                        | Serious RoB                             | Low RoB (probably)                           | Low RoB                                    | Low RoB                        | Low RoB                        |
| Rymes 2002     | Serious RoB  | ⇒ | Unclear (moderate) RoB    | Unclear (moderate) RoB         | Serious RoB                             | Low RoB (probably)                           | Serious RoB                                | Low RoB                        | Low RoB                        |

| Study            | OVERALL RoB  |   | Risk of bias for sampling | Risk of bias for response rate | Risk of bias for measurement instrument | Risk of bias for Intended use of measurement | Risk of bias for health state presentation | Risk of bias for Understanding | Risk of bias for data analysis |
|------------------|--------------|---|---------------------------|--------------------------------|-----------------------------------------|----------------------------------------------|--------------------------------------------|--------------------------------|--------------------------------|
| Sousou 2010      | Serious RoB  | ⇒ | Unclear (moderate) RoB    | Low RoB                        | Serious RoB                             | Low RoB (probably)                           | Serious RoB                                | Low RoB                        | Low RoB                        |
| Spahn 2002       | Serious RoB  | ⇒ | Low RoB                   | Unclear (moderate) RoB         | Serious RoB                             | Unclear (moderate) RoB                       | Low RoB                                    | Low RoB                        | Low RoB                        |
| Tavoly 2016      | Low RoB      | ⇒ | Low RoB                   | Low RoB                        | Low RoB                                 | Low RoB (probably)                           | Low RoB                                    | Low RoB                        | Low RoB                        |
| Utne 2016        | Critical RoB | ⇒ | Low RoB                   | Critical RoB                   | Low RoB                                 | Low RoB (probably)                           | Low RoB                                    | Low RoB                        | Low RoB                        |
| VAN KORLAAR 2005 | Serious RoB  | ⇒ | Unclear (moderate) RoB    | Low RoB                        | Serious RoB                             | Low RoB (probably)                           | Serious RoB                                | Low RoB                        | Low RoB                        |
| Westrich 2003    | Moderate RoB | ⇒ | Low RoB                   | Unclear (moderate) RoB         | Low RoB                                 | Low RoB                                      | Low RoB                                    | Low RoB                        | Low RoB                        |
| Wilke 2009       | Low RoB      | ⇒ | Low RoB                   | Low RoB                        | Low RoB                                 | Low RoB (probably)                           | Low RoB                                    | Low RoB                        | Low RoB                        |
| Williams 2006    | Serious RoB  | ⇒ | Low RoB                   | Low RoB                        | Serious RoB                             | Unclear (moderate) RoB                       | Unclear (moderate) RoB                     | Low RoB                        | Serious RoB                    |
| Wong 2015        | Serious RoB  | ⇒ | Low RoB                   | Low RoB                        | Serious RoB                             | Low RoB (probably)                           | Serious RoB                                | Low RoB                        | Low RoB                        |
| Zolfaghari 2014  | Serious RoB  | ⇒ | Unclear (moderate) RoB    | Unclear (moderate) RoB         | Serious RoB                             | Low RoB (probably)                           | Serious RoB                                | Low RoB                        | Low RoB                        |

Table 5S. – Qualitative Studies’ characteristic table

| Author(s)                            | Title                                                                                                                                                     | Date | Country           | Study design                                                 | Methodology                                                                               | Participants and participant characteristics                                                                                                                                                                                                                                                   |
|--------------------------------------|-----------------------------------------------------------------------------------------------------------------------------------------------------------|------|-------------------|--------------------------------------------------------------|-------------------------------------------------------------------------------------------|------------------------------------------------------------------------------------------------------------------------------------------------------------------------------------------------------------------------------------------------------------------------------------------------|
| <b>Apenteng, P. N., et al.</b>       | Patients' perceptions and experiences of the prevention of hospital-acquired thrombosis: a qualitative study.                                             | 2016 | UK                | Mixed-methods (qualitative component nested in larger study) | Framework analysis; Semi-structured interviews                                            | 31 patients requiring venous thromboembolism (VTE) prophylaxis following a recent hospital admission                                                                                                                                                                                           |
| <b>Haxaire, C., et al.</b>           | A Qualitative Study to Appraise Patients and Family Members Perceptions, Knowledge, and Attitudes towards Venous Thromboembolism Risk.                    | 2015 | Canada and France | Mixed-methods (qualitative component nested in larger study) | Qualitative interpretive approach; thematic analysis                                      | 10 patients with (1) either the factor V Leiden or the G20210A prothrombin gene mutation abnormality or not; and (2) an episode of symptomatic PE or an episode of symptomatic isolated proximal DVT                                                                                           |
| <b>Hunter, R., et al.</b>            | “Post-thrombotic panic syndrome”: A thematic analysis of the experience of venous thromboembolism.                                                        | 2017 | UK                | Qualitative                                                  | Inductive thematic analysis; Semi-structured interviews                                   | 7 women and 5 men (the ages ranged from 18 to 66) experienced a VTE within the previous 6 months                                                                                                                                                                                               |
| <b>Kline, J. A., et al.</b>          | Outpatient treatment of low-risk venous thromboembolism with monotherapy oral anticoagulation: patient quality of life outcomes and clinician acceptance. | 2016 | USA               | Mixed-methods (Qualitative component of mixed-method study.) | Qualitative questionnaire with three open-ended questions                                 | 253 unique Hestia-negative VTE patients, including 67 with PE                                                                                                                                                                                                                                  |
| <b>Martens, T. Z. and J. D. Emed</b> | The Experiences and Challenges of Pregnant Women Coping with Thrombophilia.                                                                               | 2007 | Canada            | Qualitative                                                  | Phenomenology methodology; semi-structured interviews; with descriptive thematic analysis | 9 married women between the ages of 30 and 36 with acquired or inherited thrombophilia who were prescribed UFH or LMWH during pregnancy and who were pregnant at the time of the study or had been pregnant within the past 12 months were eligible. 5 participants were pregnant at the time. |
| <b>May, V., et al.</b>               | What information patients require on graduated compression stockings.                                                                                     | 2006 | UK                | Qualitative                                                  | Descriptive case study; telephone interviews                                              | 12 adults who had been patients within the past 2 months, and who had worn compression stockings for more than 48 hours                                                                                                                                                                        |
| <b>Mockler, A., et al.</b>           | The experience of patients with cancer who develop venous                                                                                                 | 2012 | Canada            | Qualitative                                                  | Descriptive qualitative study;                                                            | 10 patients (5 in-patients and 5 out-patients) aged 35-78 years, including 4 women and 6 men                                                                                                                                                                                                   |

| Author(s)                         | Title                                                                                                                                                                       | Date | Country | Study design | Methodology                                               | Participants and participant characteristics                                                                                                                                                                                                                                                                                                                                                                        |
|-----------------------------------|-----------------------------------------------------------------------------------------------------------------------------------------------------------------------------|------|---------|--------------|-----------------------------------------------------------|---------------------------------------------------------------------------------------------------------------------------------------------------------------------------------------------------------------------------------------------------------------------------------------------------------------------------------------------------------------------------------------------------------------------|
|                                   | thromboembolism: an exploratory study.                                                                                                                                      |      |         |              | Semi-structured interviews                                |                                                                                                                                                                                                                                                                                                                                                                                                                     |
| <b>Najafzadeh, M., et al.</b>     | Patients' perception about risks and benefits of antithrombotic treatment for the prevention of venous thromboembolism (VTE) after orthopedic surgery: a qualitative study. | 2015 | USA     | Qualitative  | Exploratory qualitative study; Semi-structured interviews | 12 patients who had recently undergone knee or hip replacement surgery at a tertiary care hospital                                                                                                                                                                                                                                                                                                                  |
| <b>Noble, S. &amp; Finlay, I.</b> | Is long-term low-molecular-weight heparin acceptable to palliative care patients in the treatment of cancer related venous thromboembolism? A qualitative study             | 2005 | UK      | Qualitative  | Semi-structured interviews                                | 40 patients, with the following conditions for inclusion: <ul style="list-style-type: none"> <li>• Under established follow-up of the palliative care service for at least one month.</li> <li>• Metastatic malignancy with no curative treatment available.</li> <li>• Receiving LMWH for proven VTE or has received treatment dose LMWH for at least seven successive days within the past two months.</li> </ul> |
| <b>Noble, S. I. R., et al.</b>    | Acceptability of low molecular weight heparin thromboprophylaxis for inpatients receiving palliative care: qualitative study.                                               | 2006 | UK      | Qualitative  | Thematic analysis; semi-structured interviews             | 28 patients receiving palliative care for cancer                                                                                                                                                                                                                                                                                                                                                                    |
| <b>Noble, S., et al.</b>          | Patients' experiences of living with cancer-associated thrombosis: the PELICAN study.                                                                                       | 2015 | UK      | Qualitative  | Framework analysis; Semi-structured interviews            | 20 patients (10 women; 10 men) receiving treatment for cancer-associated thrombosis [CAT] (receiving LMWH for a proven new VTE (DVT or PE) and having received such treatment for at least two consecutive months)                                                                                                                                                                                                  |



| Author(s)                    | Title                                                                                                        | Date | Country        | Study design | Methodology                                           | Participants and participant characteristics                                                                                                                                                                                                                                                                                                                                                                                                             |
|------------------------------|--------------------------------------------------------------------------------------------------------------|------|----------------|--------------|-------------------------------------------------------|----------------------------------------------------------------------------------------------------------------------------------------------------------------------------------------------------------------------------------------------------------------------------------------------------------------------------------------------------------------------------------------------------------------------------------------------------------|
| <b>Saukko, P. M., et al.</b> | Are genetic tests exceptional? Lessons from a qualitative study on thrombophilia.                            | 2006 | UK             | Qualitative  | Thematic analysis; semi-structured interviews         | 42 patients with personal history of DVTs and with a family history of DVTs or thrombophilia                                                                                                                                                                                                                                                                                                                                                             |
| <b>Seaman, S., et al.</b>    | Cancer-associated thrombosis, low-molecular-weight heparin, and the patient experience: a qualitative study. | 2014 | UK             | Qualitative  | Thematic content analysis; Semi-structured interviews | 14 patients who were: 1) receiving LMWH for a proven new VTE (DVT or PE) and having received such treatment for at least 3 consecutive months; 2) diagnosis of active advanced cancer, to include locally advanced cancers with no curative treatment available (eg, primary brain tumors and cancers with distant metastatic spread).                                                                                                                   |
| <b>Wild et al.</b>           | Patient perspectives on taking vitamin K antagonists: a qualitative study in the UK, USA and Spain           | 2009 | UK, USA, Spain | Qualitative  | Thematic analysis; Semi-structured interviews         | 60 patients were recruited into the study: 20 each from the UK, USA and Spain. In total, 40% of the patients had completed college or university, 47% of the patients were diagnosed with AF and 53% with VTE. Patients with AF had received a VKA for an average of 6 years. Among the respondents receiving a VKA for VTE, the average treatment duration was 4 years, with 22% of all patients having been receiving therapy for longer than 5 years. |

Table 6S. Descriptive summary of included qualitative studies (N = 15)

| <b>Study Design</b>                 | <b>N</b> |
|-------------------------------------|----------|
| Qualitative                         | 12       |
| Mixed-methods                       | 3        |
| <b>Qualitative Methodologies</b>    | <b>N</b> |
| Descriptive case study              | 1        |
| Phenomenology                       | 1        |
| Qualitative (otherwise unspecified) | 13       |
| <b>Study Location</b>               | <b>N</b> |
| Canada                              | 2        |
| Canada & France                     | 1        |
| USA                                 | 2        |
| UK                                  | 9        |
| UK, USA, & Spain                    | 1        |

Table 7S. – Qualitative Studies’ – Strengths and Weaknesses

|    | <b>Study Authors</b>    | <b>Strengths</b>                                                                                                                                                                                                                                                                                                                                                | <b>Weaknesses</b>                                                                                                                                                                                                                                 |
|----|-------------------------|-----------------------------------------------------------------------------------------------------------------------------------------------------------------------------------------------------------------------------------------------------------------------------------------------------------------------------------------------------------------|---------------------------------------------------------------------------------------------------------------------------------------------------------------------------------------------------------------------------------------------------|
| 1. | Apenteng, P. N., et al. | <p>Ethics approval sought</p> <p>Verification of interview data was completed through triangulation with the corresponding survey responses to establish credibility and dependability</p> <p>Data collection continued until theoretical saturation was attained</p> <p>Specifically describes characteristics of the researcher interviewing participants</p> | <p>Surgical patients were over-represented, and inclusion of medical patients would have provided a broader representation of hospitalized patients</p> <p>No explanation of why the authors used framework analysis</p>                          |
| 2. | Haxaire, C., et al.     | <p>Ethics approval sought</p> <p>Specifically describes characteristics of the researcher interviewing participants</p> <p>Data collection continued until theoretical saturation was attained</p>                                                                                                                                                              | <p>Relatively small sample size (n=10)</p>                                                                                                                                                                                                        |
| 3. | Hunter, R., et al.      | <p>Ethics approval sought</p> <p>Researchers had clearly justified the selection of research methodology based on her research objective</p> <p>Clear description of domain and theme development</p> <p>Includes recommendations for practice and future research</p>                                                                                          | <p>Analysis was largely conducted by one investigator (second investigator reviewed the analysis only)</p> <p>No mention of data saturation</p>                                                                                                   |
| 4. | Kline, J. A., et al.    | <p>Ethics approval sought</p> <p>Study included acknowledgment that medical students who administered the survey and questions were trained to do so</p> <p>Three investigators independently conducted the analysis</p>                                                                                                                                        | <p>Qualitative part of a mixed-methods study: no explanation of how the qualitative component adds to the quantitative part</p> <p>Researcher has not clearly justified the selection of research methodology based on her research objective</p> |

|    | Study Authors                 | Strengths                                                                                                                                                                                                                                                                                                                                                                                                                             | Weaknesses                                                                                                                                                                                                                                                                                                                   |
|----|-------------------------------|---------------------------------------------------------------------------------------------------------------------------------------------------------------------------------------------------------------------------------------------------------------------------------------------------------------------------------------------------------------------------------------------------------------------------------------|------------------------------------------------------------------------------------------------------------------------------------------------------------------------------------------------------------------------------------------------------------------------------------------------------------------------------|
|    |                               |                                                                                                                                                                                                                                                                                                                                                                                                                                       | <p>Limited collection of qualitative data (only 3 optional, written open-ended questions in quantitative survey, lacking the depth of conventional qualitative data collection)</p> <p>No mention of data saturation</p> <p>Poor description of analytical procedure (no clear description of the development of themes)</p> |
| 5. | Kuljis, J., et al.            | <p>Ethics approval sought</p> <p>Researchers had clearly justified the selection of research methods based on her research objective</p> <p>Convenience sampling</p> <p>Relatively small number of participants (n=17)(even though authors described reaching data saturation)</p> <p>Study included acknowledgment of the investigator's no prior personal contact or relationship with participants who took part in this study</p> | <p>Not clear how many researchers participated in the analysis process after the initial coding stage</p>                                                                                                                                                                                                                    |
| 6. | Martens, T. Z. and J. D. Emed | <p>Ethics approval sought</p> <p>Researchers had clearly justified the selection of research methodology based on her research objective</p> <p>Includes implications for health providers</p>                                                                                                                                                                                                                                        | <p>Relatively small sample size (n=9) and no mention of data saturation or justification for a small sample size</p> <p>Appears to be a single author analysis, under review and validation of another author; no description of initial independent coding</p>                                                              |
| 7. | May, V., et al.               | <p>Ethics approval sought</p> <p>Researchers had clearly justified the selection of research methodology based on her research objective</p>                                                                                                                                                                                                                                                                                          | <p>Not clear how many researchers participated in the coding process</p>                                                                                                                                                                                                                                                     |

|     | Study Authors            | Strengths                                                                                                                                                                                                                                                                                                                                                                                                                                                         | Weaknesses                                                                                                 |
|-----|--------------------------|-------------------------------------------------------------------------------------------------------------------------------------------------------------------------------------------------------------------------------------------------------------------------------------------------------------------------------------------------------------------------------------------------------------------------------------------------------------------|------------------------------------------------------------------------------------------------------------|
|     |                          | <p>Field testing of interview guide with 2 subjects</p> <p>Relatively small number of participants (n=12) (even though authors described reaching data saturation)</p> <p>Includes implications for practice and policy</p>                                                                                                                                                                                                                                       | Poor description of analytical procedure (no description of how they developed the themes)                 |
| 8.  | Mockler, A., et al.      | <p>Ethics approval sought</p> <p>Researcher has clearly justified the selection of research methods based on her research objective</p> <p>Purposive sampling</p> <p>Relatively small number of participants (n=10) (even though authors discussed data saturation)</p> <p>Study included acknowledgment of the investigator's own experiences and assumptions about the phenomenon of study</p> <p>Includes recommendations for practice and future research</p> | Unclear if analysis was independent and/or done by multiple researchers                                    |
| 9.  | Najafzadeh, M., et al.   | <p>Ethics approval sought</p> <p>Relatively small sample size (n=12) (even though authors described reaching data saturation)</p> <p>Two authors reviewed and analyzed the transcripts separately before meeting to discuss codes and emergent and recurrent themes together with a third author</p>                                                                                                                                                              |                                                                                                            |
| 10. | Noble, S., et al. (2005) | <p>Ethics approval sought</p> <p>Maximum variation sampling</p>                                                                                                                                                                                                                                                                                                                                                                                                   | Researcher has not clearly justified the selection of research methodology based on the research objective |

|     | Study Authors            | Strengths                                                                                                                                                                                                                                                                                                                                                                                                          | Weaknesses                                                                                                                     |
|-----|--------------------------|--------------------------------------------------------------------------------------------------------------------------------------------------------------------------------------------------------------------------------------------------------------------------------------------------------------------------------------------------------------------------------------------------------------------|--------------------------------------------------------------------------------------------------------------------------------|
|     |                          | Data collection continued until theoretical saturation was attained                                                                                                                                                                                                                                                                                                                                                | Not clear how many researchers participated in the analysis process                                                            |
| 11. | Noble, S., et al. (2006) | <p>Ethics approval sought</p> <p>Researcher has clearly justified the selection of research methodology based on her research objective</p> <p>Recruitment continued until data saturation (n=28) had been reached in the analysis</p> <p>Includes recommendations for practice</p>                                                                                                                                | <p>Poor description of analytical procedure</p> <p>Unclear if analysis was independent and/or done by multiple researchers</p> |
| 12. | Noble, S., et al. (2015) | <p>Ethics approval sought</p> <p>Researcher has clearly justified the selection of research methodology based on her research objective</p> <p>Study included acknowledgment of the investigator's no prior personal contact or relationship with participants who took part in this study</p> <p>Clear rationale for the adoption of the theoretical framework</p> <p>Clear description of theme, development</p> | <p>No mention of data saturation</p> <p>Unclear if analysis was independent and/or done by multiple researchers</p>            |
| 13. | Saukko, P. M., et al.    | <p>Ethics approval sought</p> <p>Maximum variation sampling</p> <p>One author reviewed the transcripts separately and other 2 authors reviewed 6 of the transcripts independently to confirm coding and themes</p>                                                                                                                                                                                                 | No mention of data saturation                                                                                                  |
| 14. | Seaman, S., et al.       | Ethics approval sought                                                                                                                                                                                                                                                                                                                                                                                             | Only one researcher analyzed most interviews (independent person checked and confirmed coding)                                 |

|     | Study Authors     | Strengths                                                                                                                                                                                                                                                                                       | Weaknesses                                                                        |
|-----|-------------------|-------------------------------------------------------------------------------------------------------------------------------------------------------------------------------------------------------------------------------------------------------------------------------------------------|-----------------------------------------------------------------------------------|
|     |                   | <p>Study included acknowledgment of the investigator's no prior personal contact or relationship with participants who took part in this study</p> <p>Relatively small number of participants (n=8) (even though authors discussed data saturation)</p> <p>Field testing of interview guide</p> |                                                                                   |
| 15. | Wild, D., et al., | <p>Ethics approval sought</p> <p>Authors described reaching data saturation</p> <p>Includes recommendations for future research</p>                                                                                                                                                             | Not clear how many researchers participated in each stage of the analysis process |
